1  
2  
3  
4  
5  
6  
7  
8  
9  
10  
11  
12  
13  
14  
15  
16  
17  
18  
19  
20  
21  
22  
23  
24  
25  
26  
27  
28  
29  
30  
31  
32

**Estrogenic action by tris(2,6-dimethylphenyl) phosphate, an impurity in resorcinol bis[di(2,6-dimethylphenyl) phosphate] flame retardant formulations, impairs the development of female reproductive functions**

Kazuhiro Sano<sup>1</sup>, Hidenori Matsukami<sup>2</sup>, Go Suzuki<sup>2</sup>, Nang Thinn Thinn Htike<sup>3</sup>, Masahiro Morishita<sup>3</sup>, Tin Tin Win Shwe<sup>1</sup>, Shunji Hashimoto<sup>4</sup>, Takaharu Kawashima<sup>5</sup>, Tomohiko Isobe<sup>1</sup>, Shoji F. Nakayama<sup>1</sup>, Shinji Tsukahara<sup>3</sup>, Fumihiko Maekawa<sup>1\*</sup>

1. Center for Health and Environmental Risk Research, National Institute for Environmental Studies, Japan (NIES), 16-2 Onogawa, Tsukuba 305-8506
2. Center for Material Cycles and Waste Management Research, NIES
3. Graduate School of Science and Engineering, Saitama University
4. Center for Environmental Measurement and Analysis, NIES
5. Center for Environmental Biology and Ecosystem Studies, NIES

\* Corresponding: Fumihiko Maekawa, Ph.D.  
Center for Health and Environmental Risk Research, National Institute for Environmental Studies, Japan (NIES), 16-2 Onogawa, Tsukuba 305-8506  
e-mail: [fmaekawa@nies.go.jp](mailto:fmaekawa@nies.go.jp)

**Acknowledgements**

This work was supported by National Institute for Environmental Studies, Japan [NIES Research Project (No.130)] to FM.

**A competing financial interests declaration**

The authors declare they have no actual or potential competing financial interests.

33  
34  
35  
36  
37  
38  
39  
40  
41  
42  
43  
44  
45  
46  
47  
48  
49  
50  
51  
52  
53  
54  
55  
56  
57  
58  
59  
60  
61  
62  
63  
64  
65  
66

## Abstract

**Background:** Developmental exposure to environmental chemicals with estrogen-like activity has been suspected to permanently impair women's health.

**Objectives:** In this study, we used a mouse model to evaluate whether a chemical having putative estrogen-like action detected by *in vitro* study, namely tris(2,6-dimethylphenyl) phosphate (TDMPP) impairs sexual differentiation of the brain.

**Methods:** To induce developmental exposure, TDMPP was administered subcutaneously to dams from gestational day 14 to parturition and to pups from postnatal day 0 to 9 at two different doses (TDMPP-high and TDMPP-low groups, respectively). To compare the results between TDMPP and typical estrogen exposures, 17 $\beta$ -estradiol was administered at two different doses on the same treatment schedule (E<sub>2</sub>-low and E<sub>2</sub>-high groups, respectively). A vehicle control group was formed by administering an equivalent volume of sesame oil to dams and to pups.

**Results:** Although there was no specific impairment in female ovary morphology, precocious puberty, detected by vaginal opening, and irregular estrous cycles, detected by vaginal cytology after sexual maturation, were found in TDMPP- and E<sub>2</sub>-treated groups, but not in the vehicle control group. In addition, lower lordosis response during reproductive behavioral tests was found in TDMPP- or E<sub>2</sub>-treated groups. To further clarify whether TDMPP directly affects sexual differentiation of the brain, we evaluated the transfer of TDMPP into the brain and the formation of sexual dimorphic nuclei. We detected a certain amount of TDMPP and its metabolites in the mouse brain after treatment, and masculinization of sexual dimorphic nuclei in the hypothalamus of female mice, suggesting the direct impact of TDMPP in developing brain.

**Discussion:** Taken together, the experimental evidence demonstrates that TDMPP directly enters the fetal and neonatal brain, inducing changes of sex-related brain structures, and impairing female reproductive functions.

67

## Introduction

68

69 One of the “Sustainable Development Goals” accepted by the United Nations in  
70 2015 is gender equality (United Nations Statistical Commission, 2016). In the field of  
71 environmental health, gender-specific health issues related to sustainable development  
72 have gained increasing attention, and the inclusion of sex and gender differences in  
73 environmental health research has been proposed (Langer et al., 2015). Among  
74 environmental health problems related to sex and gender, sex difference of the  
75 biological responses when exposed to chemicals should be addressed more  
76 intensively, because the current male-bias in the use of experimental animals  
77 (Prendergast et al., 2014), even when evaluating the toxicity of new products, might  
78 prevent the detection of harmful effects in females. In particular, the effect of  
79 endocrine-disrupting chemicals has been known to be considerably sex-biased, and  
80 the effect of the exposition to endocrine disruptors in a vulnerable period such as the  
81 perinatal period is especially serious because of the permanence of the effects  
82 (Diamanti-Kandarakis et al., 2009). Therefore, the systematic evaluation of the  
83 impairment of sexual differentiation by new products using both males and females is  
84 required to elucidate their harmful effects.

85 In mammals, sexual differentiation of physiology and behavior during development  
86 is controlled not only by sex chromosomes, but also by gonadal steroid hormones. It  
87 has been reported that testosterone secreted from the testes during the developmental  
88 period in rodents is critical for determining the orientation of various kinds of  
89 behaviors, including sexual and social behaviors (Phoenix et al., 1959). In empirical  
90 studies using rodents, neonatal injection of testosterone was reported to cause  
91 abnormality in the estrous cycle, detectable by vaginal cytology, and to decrease  
92 female reproductive receptivity to males after sexual maturation, detectable by a  
93 typical receptive behavior called lordosis (Maekawa et al., 2014). Since the  
94 impairments in female-specific physiological and behavioral parameters have also  
95 occurred by neonatal injection of estrogen instead of testosterone, estrogen converted  
96 from testosterone in the brain by aromatase is thought to mediate them (MacLusky  
97 and Naftolin, 1981). Not only endogenous estrogen, but also chemicals with  
98 estrogenic activity, known as xenoestrogens, have been known to impair the  
99 development of female physiology and behavior. Estrogen affects sexual  
100 differentiation of the brain by acting on estrogen receptor alpha (ER- $\alpha$ ), because the  
101 typical sexually dimorphic nuclei of the preoptic area (SDN-POA) and the bed  
102 nucleus of the stria terminalis (BnST) were reported to develop in an ER- $\alpha$  dependent  
103 manner (Patchev et al., 2004; Tsukahara et al., 2011). Among xenoestrogens,  
104 bisphenol-A, used in the manufacturing of polycarbonate products, has become  
105 notorious, because a considerable amount of empirical evidence shows that it exerts  
106 its endocrine-disrupting action at least in part through ER- $\alpha$  (Gould et al., 1998),  
107 even if other estrogen receptors could also be related to its harmful effects  
108 (Alonso-Magdalena et al., 2012). More recently, the chemicals used for flame  
109 retardation, such as polybrominated diphenyl ethers (BDEs), have been reported to  
110 impair brain development by affecting thyroid-related and estrogenic cellular  
111 pathways (Zhou et al., 2002; Meerts et al., 2001). Therefore, the use of a certain type  
112 of penta-BDE and octa-BDE technical formulations such as BDE-47 and BDE-99 has  
113 been strictly regulated in many countries (European Parliament, 2002) and  
114 decabromodiphenyl ether was recently listed as persistent organic pollutants under the  
115 Stockholm Convention. Other than brominated flame retardants, phosphate flame

116 retardants are used worldwide (Van der Veen et al., 2012). However, the evaluation of  
117 possible endocrine-disrupting actions of phosphate flame retardants is less advanced  
118 compared to that of brominated flame retardants. Recently, one of the co-authors of  
119 this study conducted a study demonstrating that tris(2,6-dimethylphenyl) phosphate  
120 (TDMPP), also known as 2,6-TXP, exerts estrogenic action at a level corresponding  
121 to about 1/10,000 of that of estradiol, by *in vitro* reporter assay (Suzuki et al, 2013).  
122 Since TDMPP is an impurity in flame retardant formulations of resorcinol  
123 bis[di(2,6-dimethylphenyl) phosphate] (PBDMPP) (Matsukami et al. 2015), whose  
124 demand has been increasing by the repressive trend of usage of BDEs, the possibility  
125 to be environmentally exposed to TDMPP will predictably increase. On the other  
126 hand, no study has been conducted whether TDMPP reveals endocrine-disrupting  
127 action *in vivo*.

128 In this study, we evaluated whether TDMPP impairs sexual differentiation of the  
129 brain using a mouse model. Moreover, to clarify whether this compound directly  
130 enters the developing brain, we measured the level of TDMPP transferred to the brain  
131 after maternal and neonatal injection. From the results of our toxicological and  
132 exposure studies, we determined that TDMPP is a novel endocrine disruptor acting  
133 directly on the mammalian brain.

134

135

## Methods

### Animals and developmental exposure to TDMPP

136 Pregnant C57BL/6J dams purchased from CLEA Japan (Tokyo, Japan) were used for  
137 perinatal exposure to TDMPP. The day on which a vaginal plug was detected was  
138 defined as gestational day (GD) 0. We prepared two experimental groups with  
139 developmental exposure to TDMPP at different doses, to discover impairments  
140 arising when perinatal mice were treated with TDMPP throughout the critical period  
141 of brain sexual differentiation. From GD 14 to parturition, TDMPP (99.9%, Hayashi  
142 Pure Chemical Ind., Ltd., Osaka, Japan), dissolved in sesame oil at the dose of 500  
143  $\mu\text{g}/0.2$  ml sesame oil/day for the TDMPP-low dose group, and 5,000  $\mu\text{g}/0.2$  ml  
144 sesame oil/day for the TDMPP-high dose group, was subcutaneously administered to  
145 dams. On top of the prenatal exposure, pups from postnatal day (PND) 0 to 9 were  
146 subcutaneously administered TDMPP at a dose of 50  $\mu\text{g}/20$   $\mu\text{l}$  sesame oil/day for the  
147 TDMPP-low group and 500  $\mu\text{g}/20$   $\mu\text{l}$  sesame oil/day for the TDMPP-high group. A  
148 vehicle control group (Oil group) was formed by administering an equivalent volume  
149 of sesame oil to dams and pups on the same experimental schedule. To reduce stress  
150 during treatments, we measured maternal and fetal body weight only at GD16 and  
151 PND0, respectively. Thus, by using the body weights measured, we estimated daily  
152 exposure levels of TDMPP-low and high dose groups. The maternal and fetal  
153 exposure level of TDMPP-low group was estimated to be 15 mg/kg bw/day and 38  
154 mg/kg bw/day, respectively, and those of TDMPP-high group was estimated to be  
155 146 mg/kg bw/day and 384 mg/kg bw/day, respectively. To compare the effects of  
156 TDMPP exposure to those of estrogen exposure, positive control groups were  
157 established by administering  $17\beta$ -estradiol ( $\text{E}_2$ ,  $\geq 98\%$ , Sigma-Aldrich, St. Louis, MO,  
158 USA) dissolved in sesame oil at the dose of 0.5  $\mu\text{g}/0.2$  ml sesame oil/day for the  
159  $\text{E}_2$ -low group and 2  $\mu\text{g}/0.2$  ml sesame oil/day for the  $\text{E}_2$ -high group, by subcutaneous  
160 injections to dams from GD 14 to parturition. As for TDMPP exposure, subcutaneous  
161 injections to pups from PND 0 to 9 were performed at the dose of 0.05  $\mu\text{g}/20$   $\mu\text{l}$   
162 sesame oil/day for the  $\text{E}_2$ -low group, and 0.2  $\mu\text{g}/20$   $\mu\text{l}$  sesame oil/day for the  $\text{E}_2$ -high  
163

164 group. The doses of E<sub>2</sub> were determined based on a previous report examining the  
165 relative action of TDMPP compared to estrogen on ER- $\alpha$  by *in vitro* CALUX assay  
166 (Suzuki et al., 2013): The action of the dose used in the E<sub>2</sub>-low group should be  
167 theoretically equivalent to the action of the dose used for the TDMPP-high group.  
168 Thus, the relative level of putative estrogenic action on ER- $\alpha$  in the five groups is the  
169 following: E<sub>2</sub>-high > E<sub>2</sub>-low  $\approx$  TDMPP-high > TDMPP-low > Oil (vehicle control).  
170 Litters were weaned from their mothers on PND 21 and housed with same-sex  
171 littermates. Throughout the study, mice were housed in a room maintained at constant  
172 temperature (24  $\pm$  1°C) and humidity (50  $\pm$  10%) with a 12/12-h light/dark cycle.  
173 Food and water were provided *ad libitum*. The administration of TDMPP to sexually  
174 mature females was also performed in order to investigate whether TDMPP affects  
175 sexual receptivity in adults. The relevant methods and results are described in the  
176 Supplemental methods and results.

177 All procedures were approved by the Animal Care and Use Committee at the NIES  
178 and conducted in strict accordance with the NIES guidelines. All efforts were made to  
179 minimize the number of animals and their suffering.

180

### 181 **Transfer to brain**

182 To determine the transfer of TDMPP to the fetal and neonatal brain, pregnant  
183 C57BL/6J females were purchased from CLEA Japan (Tokyo, Japan). Fifteen dams  
184 were subcutaneously injected with TDMPP (5,000  $\mu$ g/0.2 ml sesame oil) on GD 16.  
185 Dams were sacrificed by decapitation and the brain and blood of the dams and the  
186 fetuses (1 to 3 of each sex per dam) were collected at the time points of 0, 8, 16, 24,  
187 and 48 h after injection (3 dams per time point). Pups born to five dams were  
188 subcutaneously injected with TDMPP (500  $\mu$ g/20  $\mu$ l sesame oil) on PND 1 and  
189 sacrificed by decapitation at the time points of 0, 8, 16, 24, and 48 h after injection (3  
190 males from 3 dams and 3 females from 3 dams per time point), and brains were  
191 collected. Samples were immediately frozen in dry-ice and stored at -75 °C.

192

### 193 **Examination of general reproductive physiology and histology**

194 After birth, all the pups were subjected to body weight (BW) and anogenital distance  
195 (AGD) measurements. The body weight was also measured at the time of weaning  
196 (PND 21) and at 10 weeks of age. The AGD was also measured at the time of  
197 weaning. All females were inspected daily for their first vaginal opening starting from  
198 PND 18 until the opening was observed. Vaginal smears were taken daily for 26 days  
199 starting from 9 weeks of age. Vaginal lavages were collected using 10  $\mu$ l pipette tips  
200 thinly wrapped with cotton moistened with deionized water. The lavages were placed  
201 on a slide glass, air-dried and stained with 0.1% methylene blue solution. The estrous  
202 stage of each individual on each day was determined based on the criteria described in  
203 Cora et al. (2015), in which the estrous cycle is divided into 5 stages as follows:  
204 proestrus (P), estrus (E), metestrus-1 (M1), metestrus-2 (M2), and diestrus (D). When  
205 female mice reached 14 weeks of age, the ovaries were bilaterally removed under  
206 isoflurane anesthesia from selected mice and weighed. The ratio of ovarian weight to  
207 body weight was compared between groups. Ovary histology was examined by  
208 paraffin sectioning and conventional hematoxylin-eosin staining.

209

### 210 **Overall scheme of the behavioral test battery**

211 When males and females reached 10 weeks and 14 weeks of age, respectively, one or  
212 two mice of each sex were randomly selected from each litter, separated from their  
213 littermates and housed individually in plastic cages (5  $\times$  22  $\times$  12 cm). At the time of

214 isolation, selected females were ovariectomized under isoflurane anesthesia. They  
215 were subjected to a behavioral test battery for emotional and socio-sexual behaviors,  
216 consisting of open field test, light-dark transition test, and sexual behavior test for  
217 both sexes, and aggressive behavior test for males only. All behavioral tests were  
218 performed during the dark phase, starting more than 2 h after lights off. After  
219 completing the behavioral tests, mice were sacrificed and blood and brain samples  
220 were collected for enzyme immunoassays and immunohistochemistry. To eliminate  
221 the litter effect, data collected from individuals were first averaged within littermates  
222 of the same sex. Thus, the data shown in this study represent the mean value of the  
223 score per litter, unless otherwise specified. The experimental design is shown in  
224 Figure 1.

225

### 226 **Open field test**

227 Seven to 9 days after isolation, each mouse was tested in an open field apparatus (60  
228 × 60 cm with 30 cm tall opaque walls) illuminated by white light (50 lux) twice in  
229 two consecutive days, each trial lasting 10 min. The floor of the apparatus was  
230 virtually divided into 25 square sections (12 × 12 cm each) and 9 inner squares were  
231 designated as the center area. At the beginning of each trial, the mouse was placed in  
232 a fixed corner, with the head facing the corner. Total moving distance (total distance)  
233 and time spent in the center area (center time) were measured digitally by an  
234 automated video tracking system (ANY-maze, Stoelting, USA).

235

### 236 **Light-dark transition test**

237 Five to 7 days after the open field test, each mouse was tested in a light-dark  
238 transition test apparatus for 10 min. The test apparatus consisted of an enclosed dark  
239 and an open-top light compartment (30 × 30 × 30 cm each), connected by an inner  
240 doorway (3 × 3 cm) located in the center of the partition at the floor level. The  
241 open-top light compartment was brightly illuminated with white light (350 lux). At  
242 the beginning of the trial, the mouse was introduced in the dark compartment. The  
243 latency to enter the light compartment and the cumulative time spent in the light  
244 compartment were measured by an automated video tracking system (ANY-maze,  
245 Stoelting, USA) (Sano et al., 2016).

246

### 247 **Male socio-sexual behavior tests**

248 Starting 5 to 7 days after the light-dark transition test, male mice were tested biweekly  
249 for sexual and aggressive behaviors. All tests were performed under red light  
250 illumination and videotaped. In the male sexual behavior test, each male was tested in  
251 its home cage for sexual behavior meant to lure female C57BL/6J mice. All lured  
252 females had been ovariectomized and primed with subcutaneous injections of  
253 estradiol benzoate (10 µg/0.1 ml dissolved in sesame oil) twice at 48 and 24 h before  
254 testing and progesterone (500 µg/ 0.1 ml dissolved in sesame oil) once at 4-6 h before  
255 testing to ensure high sexual receptivity. Three trials were performed, each lasting 30  
256 min. The number of attempted mounts, mounts, and intromissions was scored for each  
257 mouse (Sano et al., 2016).

258 In the male aggressive behavior test, each mouse was tested in a resident-intruder  
259 paradigm against olfactory bulbectomized male C57BL/6J mice. On each trial week,  
260 the mice were tested on three consecutive days, for a total of 9 trials, each lasting 15  
261 min. The number and duration of aggressive bouts toward the intruder were scored for  
262 each mouse. The data from the 3 trials performed each week were averaged for each  
263 mouse and used for statistical analysis. An aggressive bout was defined as a set of

264 behavioral interactions that included at least one of the following actions: Chasing,  
265 boxing, wrestling, biting, tail-rattling, and offensive lateral attack. If the interval  
266 between 2 aggressive bouts did not exceed 3 seconds, the 2 bouts were considered to  
267 be continuous and scored as 1 bout (Sano et al., 2016).

268

### 269 **Female sexual behavior test**

270 Five to 7 days after the light-dark transition test, female mice were tested for sexual  
271 behavior toward a sexually experienced ICR/JCL male mouse in the male's home  
272 cage. The test was performed weekly for a total of 5 trials. Female mice were tested  
273 under an artificial estrous condition in which they had been primed with subcutaneous  
274 injection of estradiol benzoate (5 µg dissolved in 0.1 ml sesame oil) twice at 48 and  
275 24 h before testing, and progesterone (250 µg dissolved in 0.1 ml sesame oil) once at  
276 4-6 h before testing. Each test lasted until females received either 15 mounts or 15  
277 intromissions. The number of lordosis responses to either mount or intromission was  
278 scored for each mouse. A lordosis quotient was calculated by dividing the number of  
279 lordosis responses by the 15 mounts or intromissions (Sano et al., 2016).

280

### 281 **Blood and brain sampling**

282 After the completion of the behavioral testing, mice were deeply anesthetized with a  
283 solution of a 1:1 mixture of sodium pentobarbital (60 mg/kg BW) and heparin (1,000  
284 units/ml), and blood was collected from the left ventricle. They were then  
285 transcardially perfused with 0.1 M phosphate-buffer (PBS; pH 7.2), followed by 4%  
286 paraformaldehyde (PFA) in 0.1 M PBS. Brains were removed, post-fixed with 4%  
287 PFA in 0.1 M PBS overnight at 4°C, and cryoprotected in 0.1 M PBS containing 30%  
288 sucrose. Sections (30 µm thick) were made on a freezing microtome (REM-710,  
289 Yamato, Japan) at 120 µm intervals. Male and female brains of the Oil, TDMPP-low,  
290 TDMPP-high and E<sub>2</sub>-low groups were used for immunohistochemistry to detect  
291 sexually dimorphic nuclei.

292

### 293 **Enzyme immunoassay for testosterone and estradiol**

294 Samples were extracted from male plasma (100 µl) with ethyl acetate. Testosterone  
295 and estradiol concentrations were determined using enzyme immunoassay kits for  
296 each hormone (Cayman Chemicals, Ann Arbor, MI, USA) according to the  
297 manufacturer's instructions.

298

### 299 **Calbindin D-28K immunohistochemistry to detect sexual dimorphic nuclei**

300 Endogenous peroxidase in the brain section was removed by incubating with 0.6%  
301 H<sub>2</sub>O<sub>2</sub> containing 0.05 M PBS with 1% Triton X-100 (PBST) for 60 min at room  
302 temperature. The sections were treated with 5% normal goat serum containing PBST  
303 for 60 min at room temperature to prevent the nonspecific binding of the antibody.  
304 Afterward, they were incubated with a monoclonal antibody against CB (C9848,  
305 Sigma Aldrich, St. Louis, MO, USA, 1:15,000) for 2 days at 4°C. Subsequently, the  
306 sections were rinsed with PBST and incubated in a peroxidase-labeled polymer  
307 conjugated with goat anti-mouse immunoglobulin (Dako Envision Plus, Dako,  
308 Carpinteria, CA, USA) for 30 min at room temperature. After rinsing again with  
309 PBST, the sections were stained with 3,3'-diaminobenzidine in chromogen solution  
310 (Dako). Finally, they were mounted on gelatin-coated slides.

311

### 312 **Delineation of sexually dimorphic nuclei**

313 CB is a protein maker for detecting two specific sexually dimorphic nuclei: The  
314 calbindin-sexually dimorphic nucleus (Calb-SDN), subregion of the medial preoptic  
315 area; and the principal nucleus of the bed nuclei of the stria terminalis (BNSTp)  
316 (Budefeld et al. 2008, Gilmore et al. 2012, Orikasa & Sakuma 2010, Sickel &  
317 McCarthy 2000). We defined the Calb-SDN as the distinctive ellipsoidal cluster of  
318 CB-immunoreactive cells at the preoptic area/anterior hypothalamus, dorsolaterally  
319 angled from the third ventricle, and located dorsal to the optic chiasm, lateral to the  
320 third ventricle, and ventral to the BNSTp (Gilmore et al, 2012). We also defined the  
321 BNSTp as the clusters of CB-immunoreactive cells between the stria terminalis and  
322 the stria medullaris of the thalamus, in the area surrounded by the lateral ventricle and  
323 the third ventricle (Gilmore et al. 2012, Moe et al. 2016, Wittmann & McLennan  
324 2013).

325

### 326 **Stereological analysis of sexually dimorphic nuclei**

327 The CB-stained sections were observed under the light microscope. The volume and  
328 number of CB-immunoreactive (CB-ir) cells in Calb-SDN and BNSTp were analyzed  
329 using the Stereo Investigator software (MBF Bioscience Inc., Williston, VT, USA).  
330 Since each slide was randomly assigned an identification number not related to the  
331 original number of the animal, the observer who performed the analysis was blinded  
332 to the sample origin. The optical fractionator method of the stereological probe  
333 workflow in the software was used to analyze the CB-stained sections. The outlines of  
334 Calb-SDN and BNSTp were traced on the left side of brain sections to determine the  
335 analysis area according to a mouse brain atlas (Paxinos & Franklin, 2004). The CB-ir  
336 cells were counted in a defined counting frame and grid for each area. Details on the  
337 analysis are reported in Table 1.

338

### 339 **Chemical analysis of TDMPP and its metabolites in brain**

340 After thawing of the brain samples, tris(3,5-dimethylphenyl-d9) phosphate (Hayashi  
341 Pure Chemical Ind., Ltd.) was added as an internal standard, and the samples were  
342 homogenized by an ultrasonic homogenization device and extracted with methanol.  
343 The crude extract was passed through the Oasis Wax (150 mg/30  $\mu$ m) cartridge  
344 column (prewashed with 5 ml of methanol). Two fractions were collected: 3 mL of  
345 methanol (fraction 1) and 5 mL of 0.5% ammonium hydroxide in methanol (fraction  
346 2). The eluate of fraction 1 was passed through the ENVI-Carb 250 mg cartridge  
347 column (prewashed with 5 ml of dichloromethane:toluene (3:1, v/v) mixture). 3 ml of  
348 dichloromethane:toluene (3:1, v/v) mixture was passed through the ENVI-Carb  
349 column and the eluate was collected (fraction 1A). The eluates of fraction 1A and 2  
350 were evaporated and redissolved in 0.5 ml of methanol. An electrospray  
351 ionization-quadrupole time-of-flight mass spectrometer (ESI-QTOF-MS) equipped  
352 with an ultra-high-performance liquid chromatograph (LC) system (1290  
353 Infinity/6530 Accurate-Mass QTOF LC/MS system; Agilent Technologies Inc., Santa  
354 Clara, CA, USA) with a reversed-phase LC column (ZORBAX Eclipse Plus C18  
355 RRHD, 50 mm  $\times$  2.1 mm i.d., 1.8  $\mu$ m; Agilent Technologies Inc.) was used for the  
356 identification and quantification of TDMPP and its metabolites. The mass range for  
357 the MS investigation was set at m/z 100–1500. The mass range for MS/MS  
358 investigation was set to m/z 50–1000. The inter- and intra-day variation of  
359 measurements were 14% and 12%, respectively, and the mean recovery rate of  
360 internal standard from fetal and neonatal brains was 75%.

361

### 362 **Statistical Analysis**



363 All data are presented as the mean  $\pm$  standard error of the mean (SEM). Data were  
364 analyzed using analysis of variance (ANOVA) followed by Bonferroni *post hoc* tests  
365 or Student t-test. Differences were considered statistically significant at p-values less  
366 than 0.05. The analysis was performed with the SPSS 19.0 statistical package (SPSS  
367 Inc., Chicago, IL, USA).  
368  
369

## Results

370

### **Body weight**

371  
372 No statistically significant effect of TDMPP exposure on body weight of either males  
373 or females at birth, PND 21, or 10 weeks of age was found (Figure 2A-F). In addition,  
374 there was no significant difference in body weight between the control Oil group and  
375 the E<sub>2</sub>-treated groups, whereas a slight but significant difference was found among the  
376 E<sub>2</sub>-treated groups. A detailed description of the statistical analysis is reported in the  
377 Supplementary Results.

378

### **Anogenital distance**

379  
380 A statistically significant effect of TDMPP exposure on AGD was found by ANOVA  
381 among the male groups at birth and PND 21, but we could not detect which groups  
382 caused the significant difference, at least by Bonferroni *post hoc* test (Figure 3A-D).  
383 There was no significant difference among the female groups at birth and PND 21. A  
384 detailed description of the statistical analysis is reported in the Supplemental results.

385

### **Female reproductive physiology and histology**

386  
387 In the TDMPP-high and E<sub>2</sub>-high groups, the day we first observed vaginal opening  
388 was significantly earlier compared to the Oil, E<sub>2</sub>-low, and TDMPP-low groups  
389 [ $F(4,17) = 20.132$ ,  $P < 0.001$ ; Bonferroni *post hoc* test:  $P < 0.001$ , TDMPP-high and  
390 E<sub>2</sub>-high vs. Oil or TDMPP-low;  $P = 0.011$ , TDMPP-high vs. E<sub>2</sub>-low;  $P = 0.018$ ,  
391 E<sub>2</sub>-high vs. E<sub>2</sub>-low; Figure 4A,B]. The estrous cycle, detected by vaginal smear after  
392 sexual maturation, was impaired in both the TDMPP and E<sub>2</sub>-exposed groups (Figure  
393 5A-E). The number of estrous days in the TDMPP-low, TDMPP-high, E<sub>2</sub>-low and  
394 E<sub>2</sub>-high groups was significantly reduced compared to the Oil group [ $F(4,24) =$   
395  $25.228$ ,  $P < 0.001$ ; Bonferroni *post hoc* test:  $P < 0.001$ , TDMPP-high, E<sub>2</sub>-low, and  
396 E<sub>2</sub>-high vs. Oil;  $P = 0.011$ , TDMPP-low vs. Oil; Figure 5F]. No difference was found  
397 in the ratio of ovarian weight to body weight between the groups [ $F(4,24) = 2.211$ ,  $P$   
398  $= 0.098$ ; Figure 6].

399

### **Open field test**

400  
401 In males, no difference was found in total moving distance or center time between the  
402 groups [Figure 7A and B]. In females, there was no significant difference in total  
403 moving distance or center time between the Oil group and other groups, whereas there  
404 was a significant difference in total moving distance between the E<sub>2</sub>-treated groups  
405 and the TDMPP-low group [Figure 7C and D]. A detailed description of the statistical  
406 analysis is reported in the Supplemental results.

407

### **Light-dark transition test**

408  
409 There was no difference in the time spent in the light compartment between the Oil  
410 group and the TDMPP-treated groups in males, whereas the male mice in the E<sub>2</sub>-high  
411 group spent significantly shorter time in the light compartment than the mice in other  
412 male groups [ $F(4,25) = 7.672$ ,  $P < 0.001$ ; Bonferroni *post hoc* test:  $P = 0.001$ , E<sub>2</sub>-high  
413 vs. Oil or TDMPP-high;  $P = 0.002$ , E<sub>2</sub>-high vs. E<sub>2</sub>-low;  $P = 0.030$ , E<sub>2</sub>-high vs.  
414 TDMPP-low; Figure 8A]. The latency to enter the light compartment did not differ  
415 among the groups [ $F(4,25) = 1.739$ ,  $P = 0.173$ ; Figure 8B]. In females, no differences  
416 were found among the groups in the time spent in the light compartment [ $F(4,24) =$   
417  $2.292$ ,  $P = 0.089$ ; Figure 8C] or the latency to enter the light compartment [ $F(4,24) =$   
418  $0.306$ ,  $P = 0.871$ ; Figure 8D].

419

420 **Male socio-sexual behavior tests**

421 Regarding male sexual behavior, no differences between the Oil group and the  
422 TDMPP-treated groups were found in the number of attempted mounts [treatment,  
423  $F(4,25) = 0.476$ ,  $P = 0.753$ ; treatment  $\times$  test number,  $F(8,50) = 1.259$ ,  $P = 0.286$ ;  
424 Figure 9A], mounts and intromissions [treatment,  $F(4,25) = 1.226$ ,  $P = 0.325$ ;  
425 treatment  $\times$  test number,  $F(8,50) = 0.441$ ,  $P = 0.890$ ; Figure 9C]. No differences were  
426 found between the Oil group and the E<sub>2</sub>-treated groups either, although the mice in the  
427 E<sub>2</sub>-high group showed significantly higher number of mounts compared to the E<sub>2</sub>-low  
428 group [treatment:  $F(4,25) = 2.831$ ,  $P = 0.046$ ; Bonferroni *post hoc* test:  $P = 0.050$ ,  
429 E<sub>2</sub>-high vs. E<sub>2</sub>-low; treatment  $\times$  day:  $F(4,25) = 1.519$ ,  $P = 0.174$ ; Figure 9B]. As for  
430 aggressive behavior, the mice in the TDMPP-high group showed significantly higher  
431 number of aggressive bouts compared to the Oil, TDMPP-low and E<sub>2</sub>-low groups  
432 [treatment:  $F(4,25) = 6.403$ ,  $P = 0.001$ ; Bonferroni *post hoc* test:  $P = 0.005$ ,  
433 TDMPP-high vs. Oil;  $P = 0.002$ , TDMPP-high vs. TDMPP-low;  $P = 0.030$ ,  
434 TDMPP-high vs. E<sub>2</sub>-low; treatment  $\times$  day:  $F(8,50) = 0.575$ ,  $P = 0.793$ ; Figure 10A].  
435 A similar tendency was observed in the total duration of aggressive bouts, but the  
436 difference was not statistically significant [treatment:  $F(4,25) = 2.158$ ,  $P = 0.103$ ;  
437 treatment  $\times$  day:  $F(8,50) = 1.147$ ,  $P = 0.350$ ; Figure 10B].

438

439 **Enzyme immunoassay for plasma testosterone and estradiol**

440 No differences among the male groups were found in plasma testosterone levels  
441 [treatment:  $F(4,25) = 1.098$ ,  $P = 0.379$ , Figure 11A]. No differences in plasma  
442 estradiol concentration between the Oil and any other group were found, whereas  
443 males in the E<sub>2</sub>-high group showed significantly higher concentrations compared to  
444 the TDMPP-low, TDMPP-high, and E<sub>2</sub>-low groups [treatment:  $F(4,25) = 5.725$ ,  $P =$   
445  $0.002$ ; Bonferroni *post hoc* test:  $P = 0.003$ , E<sub>2</sub>-high vs. TDMPP-high or E<sub>2</sub>-low;  $P =$   
446  $0.027$ , E<sub>2</sub>-high vs. TDMPP-low; Figure 11B].

447

448 **Female sexual behavior**

449 The lordosis quotient, an index of sexual receptivity, in the mice of the TDMPP-high,  
450 E<sub>2</sub>-low and E<sub>2</sub>-high groups was significantly reduced compared to that of the Oil  
451 group [treatment:  $F(4,24) = 6.822$ ,  $P = 0.001$ ; Bonferroni *post hoc* test,  $P = 0.001$ ,  
452 TDMPP-high vs. Oil;  $P = 0.008$ , E<sub>2</sub>-low vs. Oil;  $P = 0.043$ , E<sub>2</sub>-high vs. Oil; treatment  
453  $\times$  day:  $F(16,96) = 1.228$ ,  $P = 0.261$ ; Figure 12], demonstrating that the  
454 endocrine-disrupting action of the exposure to either E<sub>2</sub> or TDMPP during the critical  
455 period of brain sexual differentiation impairs the development of sexual receptive  
456 behavior.

457

458 **Analysis of sexually dimorphic nuclei**

459 Calb-SDN volume and cell number were significantly higher in the male than in the  
460 female Oil group (Student t-test:  $P < 0.001$ , Figure 13A, B, C, and D). In females,  
461 Calb-SDN volume and cell number in the TDMPP-low, TDMPP-high and E<sub>2</sub>-low  
462 groups were significantly higher than in the Oil group (ANOVA: volume:  $F(3,15) =$   
463  $22.734$ ,  $P < 0.001$ ; Bonferroni *post hoc* test:  $P < 0.001$ , TDMPP-low and  
464 TDMPP-high vs. Oil,  $P = 0.001$ , E<sub>2</sub>-low vs. Oil, number:  $F(3,15) = 19.012$ ,  $P < 0.001$ ;  
465 Bonferroni *post hoc* test:  $P < 0.001$ , TDMPP-low, TDMPP-high and E<sub>2</sub>-low vs. Oil,  
466 Figure 13B and D). In males, Calb-SDN volume and cell number of the TDMPP-low  
467 group were significantly higher than the Oil group, but there was no significant  
468 difference among the Oil, TDMPP-high and E<sub>2</sub>-low groups (ANOVA: volume:  
469  $F(3,14) = 14.372$ ,  $P < 0.001$ ; Bonferroni *post hoc* test:  $P < 0.001$ , TDMPP-low vs. Oil,

470 number:  $F(3,14) = 4.678$ ,  $P = 0.018$ ; Bonferroni *post hoc* test:  $P = 0.021$ ,  
471 TDMPP-low vs. Oil Figure 13A and C).

472 Similarly, BNSTp volume and cell number were significantly higher in the male than  
473 in the female Oil group (Student t-test:  $P = 0.001$ , Figure 13E,F,G and H). BNSTp  
474 cell number in the females of the TDMPP-high groups were significantly higher than  
475 in the Oil group (ANOVA:  $F(3,15) = 5.369$ ,  $P = 0.009$ ; Bonferroni *post hoc* test:  $P =$   
476  $0.009$ , TDMPP-high vs. Oil, Figure 13H), whereas no difference was found in the  
477 volume (ANOVA:  $F(3,16) = 1.221$ ,  $P = 0.334$ , Figure 13F). In males, there was no  
478 difference in either BNSTp volume or cell number between groups (ANOVA:  
479 volume:  $F(3,14) = 0.871$ ,  $P = 0.480$ , number:  $F(3,14) = 0.216$ ,  $P = 0.884$ , Figure 13E  
480 and G).

481

#### 482 **Concentrations of TDMPP and its metabolites in brain**

483 Using MS and MS/MS, we first detected TDMPP and its metabolites in neonatal  
484 (PND 1) brain samples 16 h after treatment with TDMPP, based on precise molecular  
485 weight information about TDMPP and its metabolites and related ions. We detected  
486 TDMPP and 4 different metabolites, denoted by di(2,6-dimethylphenyl) phosphate  
487 (DDMPP), TDMPP-M1, TDMPP-M2-1, and TDMPP-M2-2. From the molecular  
488 structure of such metabolites, a number of conclusions could be drawn: (1) DDMPP is  
489 a hydroxylation metabolite of TDMPP; (2) TDMPP-M2-1 and TDMPP-M2-2 are  
490 oxidation metabolites of TDMPP; and (3) TDMPP-M1 is an oxidation metabolite of  
491 DDMPP, or a hydroxylation metabolite of TDMPP-M2-1 or TDMPP-M2-2  
492 (Supplemental figure 1). We measured the levels of TDMPP and its metabolites in  
493 fetal (GD 16) and neonatal (PND 1) brain samples at 0, 8, 16, 24 and 48 h after  
494 treatment with TDMPP. In the case of fetal brain samples, TDMPP levels rose to 70  
495 ng/g 8 h after treatment, corresponding to 0.000070% of the treatment dose (5,000  
496  $\mu\text{g}$ ). In the case of neonatal brain samples, TDMPP and its metabolites were detected  
497 8 h after treatment, and the TDMPP level rose to 870 ng/g 16 h after treatment,  
498 corresponding to 0.017% of the treatment dose (500  $\mu\text{g}$ ), suggesting that the relative  
499 accumulation of TDMPP is higher in the neonatal than in the fetal brain. In the fetal  
500 brain, TDMPP was also still detectable at 16, 24, and 48 h, and its levels were 34%,  
501 93%, and 28% of the 8-hour level, respectively. In the neonatal brain, TDMPP was  
502 still detectable at 24 and 48 h, with levels corresponding to 27% and 16% of that at 16  
503 h, respectively (Supplemental table 1 and 2).

504

505

506

507

## Discussion

508

509 In this study, we evaluated the endocrine-disrupting action of TDMPP, an impurity in  
510 flame retardant formulations of PBDMPP not recognized as an endocrine disruptor,  
511 although the acute and chronic toxicities of TDMPP have already been evaluated  
512 (Van der Veen & de Boer, 2012). However, a recent *in vitro* screening of  
513 representative phosphate flame retardants and related compounds found the activation  
514 of ER- $\alpha$  by TDMPP to be at a level corresponding to about 1/10,000 of that of  
515 estradiol. This activation is the highest among 23 chemicals examined in the study,  
516 and the activation potency of TDMPP is considered to be similar to that of  
517 bisphenol-A, reported in previous literature (Suzuki et al., 2013). Thus, we judged  
518 that the endocrine-disrupting action of TDMPP exposure should be preferentially  
519 examined compared to other phosphate flame retardants and related chemicals. To  
520 evaluate the estrogenic activity of TDMPP, we decided to use a mouse model to  
521 specifically investigate the impairment in brain sexual differentiation. The influence  
522 of chemicals having estrogenic activity, such as diethylstilbestrol, bisphenol-A, and a  
523 certain type of flavonoids, is known to disturb the brain sexual differentiation when  
524 administered during either late pregnancy or the neonatal period, i.e. the critical  
525 periods of brain differentiation in rodents (Mendes, 2002; Vandenberg et al., 2009).  
526 Therefore, we administered TDMPP, and E<sub>2</sub> as a positive control, to mice throughout  
527 the critical period and examined the behavioral, physiological and histological  
528 changes related to reproduction.

529 Given that no significant differences in body weight and AGD during development  
530 in the TDMPP-treated groups were found, gross morphological effects could not be  
531 detected, at least with the treatment schedule we used. However, we cannot exclude  
532 the possibility that TDMPP affects the morphogenesis of estrogen-sensitive organs,  
533 because it has been reported that estrogenic agents in general affect AGD when  
534 administered at earlier time points (Honma et al., 2002). On the other hand, we could  
535 detect impairments in different aspects of female physiology and behavior due to  
536 developmental exposure to TDMPP, although the open field and light-dark transition  
537 tests were not altered. Acceleration of vaginal opening, an index of precocious  
538 puberty, and irregular estrous cycle, an index of impairment in the  
539 hypothalamo-pituitary-gonadal axis, are known to be typical effects of exposure to  
540 estrogenic chemicals of rodents in the critical period of brain sexual differentiation:  
541 Our results obtained in both TDMPP- and E<sub>2</sub>-treated females were in agreement with  
542 the reported impairments in animals developmentally exposed to estrogenic chemicals.  
543 Similarly, sexual receptivity in females, examined by the lordosis behavior test, was  
544 impaired by developmental exposure to TDMPP. Since these physiological and  
545 behavioral changes mostly coincided with those due to exposure to the positive  
546 control E<sub>2</sub>, we conclude that the effect of TDMPP on female reproductive function  
547 impairment is mediated by the activation of the estrogen signaling pathways, as  
548 expected.

549 In rodents, the differentiation of core sexual behavior and reproductive physiology is  
550 thought to be influenced by exposure to gonadal hormones, whereas the sexual  
551 differentiation of various other aspects of physiology and behavior, such as social  
552 communication, is thought to be determined at least in part by the interaction of  
553 gonadal hormones and sex chromosomes (Arnold, 2004; McCarthy & Arnold, 2011,  
554 Maekawa et al., 2014). In particular, sexual and aggressive behaviors are thought to  
555 be masculinized and de-feminized by the exposure to testosterone secreted from testes  
556 during the critical period of brain sexual differentiation (Bronson & Desjardins, 1968;

557 Pfaff & Zigmond, 1971). Testosterone that enters the brain can be converted into E<sub>2</sub>  
558 by brain aromatase, and the activation of estrogen receptors by locally synthesized  
559 brain E<sub>2</sub> mediates the process of brain masculinization and de-feminization (Naftolin  
560 et al., 1971; McEwen et al., 1977). Conversely, the lack of exposure to testosterone  
561 and/or estrogen during the critical period of sexual differentiation is essential for the  
562 differentiation of female receptive behavior. Indeed, the exogenous injection of either  
563 testosterone or estrogen during the critical period of sexual differentiation was  
564 reported to impair the development of sexual behavior in females (McDonald &  
565 Doughty, 1972; Kouki et al., 2003; Kanaya & Yamanouchi, 2012). Furthermore, since  
566 loss-of-function in estrogen signaling by ER- $\alpha$ , but not ER- $\beta$ , gene knockout impairs  
567 masculinization and de-feminization (Ogawa et al., 1998, 1999), the process of  
568 differentiation of female receptive behavior and reproductive physiology is  
569 predominantly mediated via the ER- $\alpha$  pathway. In order to know whether ER- $\alpha$  in the  
570 brain is “directly” involved in the physiological and reproductive functions, we  
571 devised various experimental approaches. As a first approach, through chemical  
572 exposure measurements, we confirmed the direct transfer of the injected TDMPP and  
573 its metabolites to both the fetal and neonatal brain. As a second approach, through  
574 histological techniques, we examined the effect of TDMPP on the formation of the  
575 typical male-dominant sexual dimorphic nuclei, finding that the volume and cell  
576 number of the Calb-SDN and BNSTp were increased up to the level of male mice by  
577 the developmental exposure of females to TDMPP. It has been reported that the  
578 treatment with an ER- $\alpha$ , but not ER- $\beta$ , agonist mimics the effect of E<sub>2</sub> on the  
579 establishment of sexual dimorphism in the sexually dimorphic nucleus of the preoptic  
580 area, including the Calb-SDN (Patchev et al., 2004; Tsukahara 2009; Sickel &  
581 McCarthy, 2000). It has also been reported that the volume and number of neurons in  
582 the BNSTp were feminized in male mice deficient in the ER- $\alpha$  gene (Tsukahara et al.,  
583 2011). These reports demonstrate that cellular signaling downstream of ER- $\alpha$  is  
584 required for the formation of these nuclei. Taken together, these previous reports and  
585 our experiments show that the activation of ER- $\alpha$  by TDMPP in the brain could be a  
586 most likely mechanism explaining the behavioral and physiological changes in female  
587 mice.

588 Concerning male behavior, the mice in the TDMPP-high group revealed higher  
589 aggressive behavior compared to those in the control Oil group, whereas there was no  
590 difference in male sexual behavior among groups. This behavioral change might  
591 reflect the impact of brain hyper-masculinization by developmental exposure to  
592 TDMPP. In terms of hormonal effects, male aggressive behavior is known to be  
593 regulated by brain sexual differentiation in the critical period, and sex steroid  
594 hormonal levels in the adult (Bronson & Desjardins, 1968). Since testosterone and  
595 estradiol levels in the adults of the TDMPP-high groups were similar to those of the  
596 Oil control group, brain sexual differentiation during the developmental period might  
597 lead to higher aggressiveness. We also examined the volume and cell number of  
598 sexual dimorphic nuclei in the male groups, but no significant change was appreciated  
599 in either Calb-SDN or BNSTp in the TDMPP-high group, although the volume and  
600 cell number of Calb-SDN were rather significantly increased in the TDMPP-low  
601 group. Therefore, we cannot find a clear histological change corresponding to the  
602 higher aggression shown by the TDMPP-high group. To summarize the results on  
603 male mice, the effect of TDMPP was limited compared to females, and the group  
604 revealing behavioral abnormality was not consistent with that revealing histological  
605 abnormality. Since the male brain is naturally formed under developmental exposure

606 to estradiol converted from testosterone within the brain, the additional estrogenic  
607 effect of TDMPP might be less pronounced in terms of activation of ER- $\alpha$ .

608 The fertility rate of mating pairs in each group was also examined (Supplemental  
609 Table 1). Mating pairs of the TDMPP-low group showed low fertility, while all  
610 mating pairs of the TDMPP-high group were infertile. These results clearly  
611 demonstrate that TDMPP exposure causes lower birth rate, presumably due to the  
612 lowered reproductive behavior and physiology in females. Usage of organophosphate  
613 flame retardants has recently increased in many household products, and the transfer  
614 of organophosphate flame retardants to house dust in living situations has been  
615 reported worldwide (Stapleton et al., 2009). Thus, not only industrial but also  
616 environmental exposure to TDMPP will be increased with the increasing use of  
617 organophosphorus phosphate flame retardants in the future. Based on our empirical  
618 data, the contamination of TDMPP in household products, and the subsequent home  
619 exposure to TDMPP during pregnancy and/or the neonatal period could be suspected  
620 to endanger women's health in the next generation. Norms limiting the contamination  
621 of TDMPP in products are thus required.

622

623

#### Acknowledgements

624 This work was supported by National Institute for Environmental Studies, Japan  
625 [NIES Research Project (No.130)] to FM.

626

627

628  
629  
630  
631  
632  
633  
634  
635  
636  
637  
638  
639  
640  
641  
642  
643  
644  
645  
646  
647  
648  
649  
650  
651  
652  
653  
654  
655  
656  
657  
658  
659  
660  
661  
662  
663  
664  
665  
666  
667  
668  
669  
670  
671  
672  
673  
674  
675  
676  
677  
678  
679

## References

- Alonso-Magdalena, P., Ropero, A. B., Soriano, S., García-Arévalo, M., Ripoll, C., Fuentes, E., ... & Nadal, Á. (2012). Bisphenol-A acts as a potent estrogen via non-classical estrogen triggered pathways. *Molecular and cellular endocrinology*, 355(2), 201-207. PMID: 22227557; doi: 10.1016/j.mce.2011.12.012
- Arnold, A. P. (2004). Sex chromosomes and brain gender. *Nature Reviews Neuroscience*, 5(9), 701. PMID: 15322528; doi: 10.1038/nrn1494
- Bronson, F. H., & Desjardins, C. (1968). Aggression in adult mice: Modification by neonatal injections of gonadal hormones. *Science*, 161(3842), 705-706. PMID: 5691022
- Büdefeld T, Grgurevic N, Tobet SA, Majdic G. Sex differences in brain developing in the presence or absence of gonads. *Dev Neurobiol*. 2008 Jun;68(7):981-95. PMID: 18418875; doi: 10.1002/dneu.20638.
- Cora, M. C., Kooistra, L., & Travlos, G. (2015). Vaginal cytology of the laboratory rat and mouse: review and criteria for the staging of the estrous cycle using stained vaginal smears. *Toxicologic pathology*, 43(6), 776-793. PMID: 25739587; doi: 10.1177/0192623315570339
- Diamanti-Kandarakis, E., Bourguignon, J. P., Giudice, L. C., Hauser, R., Prins, G. S., Soto, A. M., ... & Gore, A. C. (2009). Endocrine-disrupting chemicals: an Endocrine Society scientific statement. *Endocrine reviews*, 30(4), 293-342. PMID: 19502515; doi: 10.1210/er.2009-0002
- European Parliament (2002). Directive 2002/95/EC of the European Parliament and of the Council on the restriction of the use of certain hazardous substances in electrical and electronic equipment Off. J. Eur. Union L 2003, 37, 19–23.
- Gilmore, R. F., Varnum, M. M., & Forger, N. G. (2012). Effects of blocking developmental cell death on sexually dimorphic calbindin cell groups in the preoptic area and bed nucleus of the stria terminalis. *Biology of sex differences*, 3(1), 5. PMID: 22336348; doi: 10.1186/2042-6410-3-5
- Gould, J. C., Leonard, L. S., Maness, S. C., Wagner, B. L., Conner, K., Zacharewski, T., ... & Gaido, K. W. (1998). Bisphenol A interacts with the estrogen receptor  $\alpha$  in a distinct manner from estradiol. *Molecular and cellular endocrinology*, 142(1-2), 203-214. PMID: 9783916
- Honma, S., Suzuki, A., Buchanan, D. L., Katsu, Y., Watanabe, H., & Iguchi, T. (2002). Low dose effect of in utero exposure to bisphenol A and diethylstilbestrol on female mouse reproduction. *Reproductive Toxicology*, 16(2), 117-122. PMID: 11955942
- Kanaya, M., & Yamanouchi, K. (2012). Defeminization of brain functions by a single injection of estrogen receptor  $\alpha$  or  $\beta$  agonist in neonatal female rats. *Neuroendocrinology*, 95(4), 297-304. PMID: 22327340; doi: 10.1159/000332128
- Kouki, T., Kishitake, M., Okamoto, M., Oosuka, I., Takebe, M., & Yamanouchi, K. (2003). Effects of neonatal treatment with phytoestrogens, genistein and daidzein, on sex difference in female rat brain function: estrous cycle and lordosis. *Hormones and Behavior*, 44(2), 140-145. PMID: 13129486



- 680 Langer, A., Meleis, A., Knaul, F. M., Atun, R., Aran, M., Arreola-Ornelas, H., ... & Claeson,  
681 M. (2015). Women and health: the key for sustainable development. *The Lancet*, 386(9999),  
682 1165-1210. PMID: 26051370; doi: 10.1016/S0140-6736(15)60497-4  
683
- 684 MacLusky, N. J., and Naftolin, F. (1981). Sexual differentiation of the central nervous system.  
685 *Science* 211, 1294–1302. PMID: 6163211; doi: 10.1126/science.6163211  
686
- 687 Maekawa, F., Tsukahara, S., Kawashima, T., Nohara, K., & Ohki-Hamazaki, H. (2014). The  
688 mechanisms underlying sexual differentiation of behavior and physiology in mammals and  
689 birds: relative contributions of sex steroids and sex chromosomes. *Frontiers in neuroscience*,  
690 8, 242. PMID: 25177264; doi: 10.3389/fnins.2014.00242  
691
- 692 Matsukami, H., Tue, N.M., Suzuki, G., Someya, M., Tuyen, le H., Viet, P.H., Takahashi, S.,  
693 Tanabe, S., Takigami, H. Flame retardant emission from e-waste recycling operation  
694 in northern Vietnam: environmental occurrence of emerging organophosphorus esters  
695 used as alternatives for PBDEs. *Sci Total Environ*. 2015 May 1;514:492-9. doi:  
696 10.1016/j.scitotenv.2015.02.008  
697
- 698 McCarthy, M. M., & Arnold, A. P. (2011). Reframing sexual differentiation of the brain.  
699 *Nature neuroscience*, 14(6), 677. PMID: 21613996; doi: 10.1038/nn.2834  
700
- 701 McDonald, P. G., & Doughty, C. (1972). Comparison of the effect of neonatal administration  
702 of testosterone and dihydrotestosterone in the female rat. *Journal of reproduction and fertility*,  
703 30(1), 55-62. PMID: 5064322  
704
- 705 McEwen, B. S., Lieberburg, I., Chaptal, C., & Krey, L. C. (1977). Aromatization: important  
706 for sexual differentiation of the neonatal rat brain. *Hormones and behavior*, 9(3), 249-263.  
707 PMID: 611076  
708
- 709 Meerts, I. A., Letcher, R. J., Hoving, S., Marsh, G., Bergman, A., Lemmen, J. G., ... &  
710 Brouwer, A. (2001). In vitro estrogenicity of polybrominated diphenyl ethers, hydroxylated  
711 PDBEs, and polybrominated bisphenol A compounds. *Environmental health perspectives*,  
712 109(4), 399. PMID: 11335189; doi: 10.1289/ehp.01109399  
713
- 714 Mendes, J. A. (2002). The endocrine disrupters: a major medical challenge. *Food and*  
715 *Chemical Toxicology*, 40(6), 781-788. PMID: 11983272  
716
- 717 Moe, Y., Tanaka, T., Morishita, M., Ohata, R., Nakahara, C., Kawashima, T., ... & Tsukahara,  
718 S. (2016). A comparative study of sex difference in calbindin neurons among mice, musk  
719 shrews, and Japanese quails. *Neuroscience letters*, 631, 63-69. PMID: 27531632; doi:  
720 10.1016/j.neulet.2016.08.018  
721
- 722 Naftolin, F., Ryan, K. J., & Petro, Z. (1971). Aromatization of androstenedione by the  
723 diencephalon. *The Journal of Clinical Endocrinology & Metabolism*, 33(2), 368-370. PMID:  
724 4935642; doi: 10.1210/jcem-33-2-368  
725
- 726 Ogawa, S., Chan, J., Chester, A. E., Gustafsson, J. Å., Korach, K. S., & Pfaff, D. W. (1999).  
727 Survival of reproductive behaviors in estrogen receptor  $\beta$  gene-deficient ( $\beta$ ERKO) male and  
728 female mice. *Proceedings of the National Academy of Sciences*, 96(22), 12887-12892.  
729 PMID: 10536018  
730
- 731 Ogawa, S., Washburn, T. F., Taylor, J., Lubahn, D. B., Korach, K. S., & Pfaff, D. W. (1998).  
732 Modifications of testosterone-dependent behaviors by estrogen receptor- $\alpha$  gene disruption in  
733 male mice. *Endocrinology*, 139(12), 5058-5069. PMID: 9832445; doi:  
734 10.1210/endo.139.12.6358

- 735  
736 Orikasa C, Sakuma Y (2010) Estrogen configures the sexual dimorphism in the preoptic area  
737 of C57/BL6J and ddN strains of mice. *Journal of Comparative Neurology* 518(17):  
738 3618-3629. PMID: 20593361; doi: 10.1002/cne.22419  
739 Patchev, A. V., Gotz, F., and Rohde, W. (2004). Differential role of estrogen receptor  
740 isoforms in sex-specific brain organization. *FASEB J.* 18, 1568–1570. PMID: 15289439; doi:  
741 10.1096/fj.04-1959fje  
742  
743 Paxinos, G., & Franklin, K. B. (2004). *The mouse brain in stereotaxic coordinates*. Gulf  
744 professional publishing.  
745  
746 Pfaff, D. W., & Zigmond, R. E. (1971). Neonatal androgen effects on sexual and non-sexual  
747 behavior of adult rats tested under various hormone regimes. *Neuroendocrinology*, 7(3),  
748 129-145. PMID: 5546026; doi: 10.1159/000121961  
749  
750 Phoenix, C. H., Goy, R. W., Gerall, A. A., and Young, W. C. (1959). Organizing action of  
751 prenatally administered testosterone propionate on the tissues mediating mating behavior in  
752 the female guinea pig. *Endocrinology* 65, 369–382. PMID: 14432658; doi:  
753 10.1210/endo-65-3-369  
754  
755 Prendergast, B. J., Onishi, K. G., & Zucker, I. (2014). Female mice liberated for inclusion in  
756 neuroscience and biomedical research. *Neuroscience & Biobehavioral Reviews*, 40, 1-5.  
757 PMID: 24456941; doi: 10.1016/j.neubiorev.2014.01.001  
758  
759 Sano, K., Isobe, T., Yang, J., Win-Shwe, T. T., Yoshikane, M., Nakayama, S. F., ... &  
760 Tohyama, C. (2016). In utero and lactational exposure to acetamiprid induces abnormalities  
761 in socio-sexual and anxiety-related behaviors of male mice. *Frontiers in neuroscience*, 10, 228.  
762 MID: 27375407; doi: 10.3389/fnins.2016.00228  
763  
764 Sickel, M. J., & McCarthy, M. M. (2000). Calbindin-D28k immunoreactivity is a marker for a  
765 subdivision of the sexually dimorphic nucleus of the preoptic area of the rat: developmental  
766 profile and gonadal steroid modulation. *Journal of neuroendocrinology*, 12(5), 397-402.  
767 PMID: 10792577  
768  
769 Stapleton, H. M., Klosterhaus, S., Eagle, S., Fuh, J., Meeker, J. D., Blum, A., & Webster, T. F.  
770 (2009). Detection of organophosphate flame retardants in furniture foam and US house dust.  
771 *Environmental science & technology*, 43(19), 7490-7495. PMID: 19848166  
772  
773 Suzuki, G., Tue, N. M., Malarvannan, G., Sudaryanto, A., Takahashi, S., Tanabe, S., ... &  
774 Takigami, H. (2013). Similarities in the endocrine-disrupting potencies of indoor dust and  
775 flame retardants by using human osteosarcoma (U2OS) cell-based reporter gene assays.  
776 *Environmental science & technology*, 47(6), 2898-2908. PMID: 23398518; doi:  
777 10.1021/es304691a  
778  
779 Tsukahara, S. (2009). Sex differences and the roles of sex steroids in apoptosis of sexually  
780 dimorphic nuclei of the preoptic area in postnatal rats. *Journal of neuroendocrinology*, 21(4),  
781 370-376. PMID: 19226350; doi: 10.1111/j.1365-2826.2009.01855.x  
782  
783 Tsukahara, S., Tsuda, M. C., Kurihara, R., Kato, Y., Kuroda, Y., Nakata, M., et al. (2011).  
784 Effects of aromatase or estrogen receptor gene deletion on masculinization of the principal  
785 nucleus of the bed nucleus of the stria terminalis of mice. *Neuroendocrinology* 94, 137–147.  
786 PMID: 21525731; doi: 10.1159/000327541  
787

- 788 United Nations Statistical Commission (2016). Report of the Inter-Agency and Expert Group  
789 on Sustainable Development Goal Indicators. 2016. [cited Nov 22 2016]. Available from:  
790 <https://www.unstats.un.org/unsd/statcom/47th-session//2016-2-IAEG-SDGs-Rev1-E.pdf>  
791
- 792 Vandenberg, L. N., Maffini, M. V., Sonnenschein, C., Rubin, B. S., & Soto, A. M. (2009).  
793 Bisphenol-A and the great divide: a review of controversies in the field of endocrine  
794 disruption. *Endocrine reviews*, 30(1), 75-95. PMID: 19074586; doi: 10.1210/er.2008-0021  
795
- 796 Van der Veen, I., & de Boer, J. (2012). Phosphorus flame retardants: properties, production,  
797 environmental occurrence, toxicity and analysis. *Chemosphere*, 88(10), 1119-1153. PMID:  
798 22537891; doi: 10.1016/j.chemosphere.2012.03.067  
799
- 800 Wittmann, W., & McLennan, I. S. (2013). The bed nucleus of the stria terminalis has  
801 developmental and adult forms in mice, with the male bias in the developmental form being  
802 dependent on testicular AMH. *Hormones and behavior*, 64(4), 605-610. PMID: 24012942;  
803 doi: 10.1016/j.yhbeh.2013.08.017  
804
- 805 Zhou, T., Taylor, M. M., DeVito, M. J., & Crofton, K. M. (2002). Developmental exposure to  
806 brominated diphenyl ethers results in thyroid hormone disruption. *Toxicological Sciences*,  
807 66(1), 105-116. PMID: 11861977

808 **Figure legends**

809

810 **Figure 1: The experimental design of the developmental exposure and behavioral**  
811 **test battery.**

812

813 **Figure 2: Effect of developmental TDMPP exposure on body weight.** (A-C) male  
814 and (D-F) female mice of each treatment group. The body weight at birth (A,D), PND  
815 21 (B,E), and 10 weeks of age (C,F). The number in parentheses indicate number of  
816 liters. The data are presented as the mean  $\pm$  SEM.  $^{***}P < 0.01$ .

817

818 **Figure 3: Effect of developmental TDMPP exposure on anogenital distance.**  
819 (A,B) male and (C,D) female of each treatment group. The anogenital distance at  
820 birth (A,C) and PND 21 (B,D). The number in parentheses indicate number of liters.  
821 The data are presented as the mean  $\pm$  SEM.

822

823 **Figure 4: Effect of developmental TDMPP exposure on first vaginal opening.** (A)  
824 Percentage of females displayed vaginal opening. (B) Average ages of first vaginal  
825 opening. The number in parentheses indicate number of liters. The data are presented  
826 as the mean  $\pm$  SEM.  $^{***}P < 0.01$  vs Oil or TDMPP-low.  $^{*}P < 0.05$  vs E<sub>2</sub>-low.

827

828 **Figure 5: Effect of developmental TDMPP exposure on estrous cycle.** (A-E) The  
829 representative estrous cycle pattern of each treatment group. E = estrus, P = proestrus,  
830 M1 = metestrus 1, M2 = metestrus 2, D = diestrus. (F) The number of cycles within  
831 the 27 days of recording period. The number in parentheses indicate number of liters.  
832 The data are presented as the mean  $\pm$  SEM.  $^{***}P < 0.01$ ,  $^{*}P < 0.05$  vs Oil.

833

834 **Figure 6: Effect of developmental TDMPP exposure on the ratio of ovarian**  
835 **weight to body weight.** The number in parentheses indicate number of liters. The  
836 data are presented as the mean  $\pm$  SEM.

837

838 **Figure 7: Effect of developmental TDMPP exposure on the open field activity.**  
839 (A,B) male and (C,D) female of each treatment group. (A,C) the total moving  
840 distance and (B,D) time spent in center area of open field test apparatus. The number  
841 in parentheses indicate number of liters. The data are presented as the mean  $\pm$  SEM.

842

843 **Figure 8: Effect of developmental TDMPP exposure on anxiety-related behavior,**  
844 **as measured in the light-dark transition test.** (A,B) male and (C,D) female of each  
845 treatment group. (A,C) the total time spent in, and (B,E) the latency to enter the light  
846 compartment of the light-dark transition apparatus. The number in parentheses  
847 indicate number of liters. The data are presented as the mean  $\pm$  SEM.  $^{***}P < 0.01$  vs  
848 Oil, TDMPP-high, or E<sub>2</sub>-low,  $^{*}P < 0.05$  vs TDMPP-low.

849

850 **Figure 9: Effect of developmental TDMPP exposure on male sexual behavior.**  
851 The total number of (A) attempted mount, (B) mount, and (C) intromission toward  
852 female stimuli. The number in parentheses indicate number of liters. The data are  
853 presented as the mean  $\pm$  SEM.  $^{*}P < 0.05$ .

854

855 **Figure 10: Effect of developmental TDMPP exposure on male aggressive**  
856 **behavior.** (A) Total number and (B) the duration of aggressive bouts toward intruder

857 stimuli. The number in parentheses indicate number of liters. The data are presented  
858 as the mean  $\pm$  SEM.  $**P < 0.01$ ,  $*P < 0.05$ .

859

860 **Figure 11: Effect of developmental TDMPP exposure on plasma testosterone and**  
861 **estradiol concentration in male.** Plasma concentration of (A) testosterone and (B)  
862 estradiol. The number in parentheses indicate number of liters. The data are presented  
863 as the mean  $\pm$  SEM.  $**P < 0.01$  vs TDMPP-high, or E<sub>2</sub>-low,  $*P < 0.05$  vs  
864 TDMPP-low.

865

866 **Figure 12: Effect of developmental TDMPP exposure on female sexual behavior.**  
867 The number in parentheses indicate number of liters. The data are presented as the  
868 mean  $\pm$  SEM.  $**P < 0.01$ ,  $*P < 0.05$  vs Oil.

869

870 **Figure 13: Effect of developmental TDMPP exposure on the sexually dimorphic**  
871 **nuclei.** (A,C,E,G) male and (B,D,F,H) female of each treatment group. (A,B) The  
872 volume and (C,D) number of cells in the Calb-SDN. (E,F) The volume and (G,H)  
873 number of cells in the BNSTp. The number in parentheses indicate number of animals.  
874 The data are presented as the mean  $\pm$  SEM.  $**P < 0.01$ ,  $*P < 0.05$  vs Oil.

875

876

877

878

## Supplementary methods

879

### **Effect of TDMPP on the induction of lordosis and uterine weight in sexually mature females**

880

881 Female C57BL/6J mice purchased from CLEA Japan (Tokyo, Japan) were  
882 ovariectomized at 11 weeks of age under isoflurane anesthesia. At 12 weeks of age  
883 (Test 1), either 17 $\beta$ -estradiol (5  $\mu$ g/2 ml sesame oil), TDMPP (99.9%, Hayashi Pure  
884 Chemical Ltd, Osaka, Japan, 50 mg/2 ml sesame oil), or sesame oil (2 ml) were  
885 subcutaneously injected twice, at 48 and 24 h before testing. Additionally,  
886 progesterone (250  $\mu$ g/0.1 ml sesame oil) was subcutaneously injected 4 h before  
887 testing. Females were tested for sexual behavior toward a sexually experienced  
888 ICR/JCL male mouse in the male's home cage. Each test lasted until females received  
889 either 15 mounts or 15 intromissions. The number of lordosis responses to either  
890 mount or intromission was scored for each mouse. A lordosis quotient was calculated  
891 by dividing the number of lordosis responses by 15 mounts or intromission. The same  
892 test was also performed at 13 weeks of age (Test 2). Immediately after the last  
893 lordosis test, females were sacrificed by decapitation and uterine weight was  
894 measured.

895

896

### **Reproduction rate in mating**

897

898 Four to five female-male pairs in the Oil, TDMPP-low, TDMPP-high and E<sub>2</sub>-low  
899 groups at 15 weeks of age were randomly selected and bred for three estrous cycles to  
900 determine whether females showed vaginal plug. In addition, the number of pups was  
901 counted if the female became pregnant and delivered.

901

902

### **Ovarian morphology**

903

904 Ovaries at 14 weeks of age were fixed by 4% paraformaldehyde in 0.05 M PBS,  
905 embedded in paraffin blocks and cut by microtome at a thickness of 10  $\mu$ m. Sections  
906 were stained by conventional hematoxylin-eosin staining and were observed by light  
907 microscopy.

907

908

909

## Supplementary results

910

911

### **Body weight**

912

913

914

915

915 No significant effect of TDMPP exposure was found on the body weight of either  
916 male or female mice at birth, PND 21 and 10 weeks of age (Figure 2A-F). On the  
917 other hand, a slight but significant difference was found among the E<sub>2</sub> positive control  
918 groups.

916

917

918

919

920

921

922

923

924

925

926

927

927 In male mice, there was no difference between the Oil and the other groups, whereas  
928 there was a statistically significant difference at birth between the E<sub>2</sub>-low and E<sub>2</sub>-high  
929 groups [ $F(4,25) = 5.215$ ,  $P = 0.003$ ; Bonferroni *post hoc* test:  $P = 0.002$ , E<sub>2</sub>-low vs.  
930 E<sub>2</sub>-high; Figure 2A]. This difference between male groups disappeared at PND 21 and  
931 10 weeks of age [PND 21:  $F(4,25) = 1.451$ ,  $P = 0.247$ , Figure 2B; 10 weeks:  $F(4,25)$   
932 = 1.154,  $P = 0.355$ , Figure 2C]. Additionally, female mice in the E<sub>2</sub>-high group were  
933 significantly heavier than those in the E<sub>2</sub>-low and TDMPP-low groups [ $F(4,24) =$   
934 5.526,  $P = 0.003$ ; Bonferroni *post hoc* test:  $P = 0.007$ , E<sub>2</sub>-high vs. E<sub>2</sub>-low or  $P = 0.004$ ,  
935 E<sub>2</sub>-high vs. TDMPP-low; Figure 2D], whereas there was no difference between the  
936 Oil group and other groups. At PND 21, there was no difference in their body weight  
937 [ $F(4,24) = 1.097$ ,  $P = 0.381$ , Figure 2E]. At 10 weeks of age, although ANOVA  
938 detected a significant treatment effect, no differences between groups were found in

928 the Bonferroni *post hoc* test [ $F(4,24) = 3.112, P = 0.034$ ; Bonferroni *post hoc* test, ns;  
929 Figure 2F].

930

### 931 **Anogenital distance**

932 In male mice, although ANOVA detected a significant treatment effect on AGD at  
933 birth, no differences between groups were revealed by Bonferroni *post hoc* test  
934 [ $F(4,25) = 3.508, P = 0.021$ ; Bonferroni *post hoc* test, ns; Figure 3A]. At PND 21,  
935 AGD did not differ between groups in males [ $F(4,25) = 2.065, P = 0.116$ ; Figure 3B].  
936 In female mice, no differences were found in AGD among groups at birth or PND 21  
937 [at birth:  $F(4,24) = 1.022, P = 0.416$ , Figure 3C; PND 21:  $F(4,24) = 1.309, P = 0.295$ ,  
938 Figure 3D].

939

### 940 **Open field test**

941 In males, no difference was found in total moving distance [treatment:  $F(4,25) =$   
942  $0.689, P = 0.606$ ; treatment  $\times$  day:  $F(4,25) = 2.264, P = 0.091$ ; Figure 7A] and center  
943 time between groups [treatment:  $F(4,25) = 0.812, P = 0.529$ ; treatment  $\times$  day:  $F(4,25)$   
944  $= 1.278, P = 0.305$ ; Figure 7B]. Although female mice in the E<sub>2</sub>-low and E<sub>2</sub>-high  
945 groups showed decreased total moving distance compared to the TDMPP-low group,  
946 there was no difference between TDMPP-exposed groups and the Oil group  
947 [treatment:  $F(4,24) = 3.975, P = 0.013$ ; Bonferroni *post hoc* test:  $P = 0.036$ , E<sub>2</sub>-low vs.  
948 TDMPP-low;  $P = 0.020$ , E<sub>2</sub>-high vs. TDMPP-low; treatment  $\times$  day:  $F(4,24) = 2.616,$   
949  $P = 0.060$ ; Figure 7C]. There was no difference in center time among groups in  
950 females [treatment:  $F(4,24) = 1.201, P = 0.336$ ; treatment  $\times$  day:  $F(4,24) = 0.225, P =$   
951  $0.921$ ; Figure 7D].

952

### 953 **Effect of TDMPP on lordosis induction and uterine weight in sexually mature** 954 **females**

955 The lordosis quotient was significantly increased by treatment with 17 $\beta$ -estradiol in  
956 both Test 1 and 2 (treatment:  $F(2,15) = 38.645, P < 0.001$ ; Bonferroni *post hoc* test:  $P$   
957  $< 0.001$ , E<sub>2</sub> vs. Oil or TDMPP; Supplemental figure 2). Although there was no  
958 statistical difference, five out of six female (83.3%) in TMDPP treated group showed  
959 at least one lordosis response whereas only one out of six female (16.7%) in oil  
960 treated group showed lordosis response in test 2 (Supplemental table 3). As for  
961 uterine weight, both estradiol benzoate and 2,6-TDMPP treatments significantly  
962 increased uterine weight ( $F(2,15) = 30.331, P < 0.001$ ; Bonferroni *post hoc* test:  $P <$   
963  $0.001$ , E<sub>2</sub> or TDMPP vs. Oil; Supplemental figure 3), demonstrating that TDMPP  
964 shows estrogenic action also in adults, even if the doses necessary for the effect  
965 should be higher than in the perinatal period.

966

### 967 **Reproduction rate in mating**

968 All females of 5 female-male pairs in the control group showed vaginal plugs by the  
969 first or second estrous cycle, and  $7.8 \pm 1.1$  pups (mean  $\pm$  SEM) were delivered from  
970 five females. On the other hand, only one out of 5 females in the E<sub>2</sub>-low group  
971 showed a vaginal plug, and none of them delivered. Similarly, none of the 5 females  
972 in the TDMPP-high group showed a vaginal plug, and no delivery occurred. In the  
973 TDMPP-low group 3 out of 4 females showed vaginal plugs within 3 estrous cycles,  
974 and deliveries occurred in 3 out of 4 females, although all the pups of a pregnant  
975 female were dead (Supplemental table 4).

976

### 977 **Ovarian morphology**

978 In the Oil and TDMPP-low groups, ovarian follicles and the corpus luteum were  
979 found. On the other hand, the corpus luteum scarcely appeared in ovaries of  
980 TDMPP-high, E<sub>2</sub>-low and E<sub>2</sub>-high groups, indicating that the release of mature eggs  
981 from ovaries was impaired (Supplemental figure 4).

982

983

### Supplemental figure legends

984

985 **Supplemental Figure 1: The molecular structures of PBDMPP, TDMPP and its 4**  
986 **different metabolites.**

987

988 **Supplemental Figure 2: Effect of TDMPP administration on lordosis induction.**

989 The number in parentheses indicate number of animals. The data are presented as the  
990 mean ± SEM. \*\**P* < 0.01.

991

992 **Supplemental Figure 3: Examination of uterotrophic property of TDMPP.** The

993 number in parentheses indicate number of animals. The data are presented as the

994 mean ± SEM. \*\**P* < 0.01 vs. Oil.

995

996 **Supplemental Figure 4: Effect of TDMPP administration on ovarian**

997 **morphology.** Representative photomicrographs of ovary sections from females of

998 each treatment group. Scale bar indicate 200 μm.

999

1000



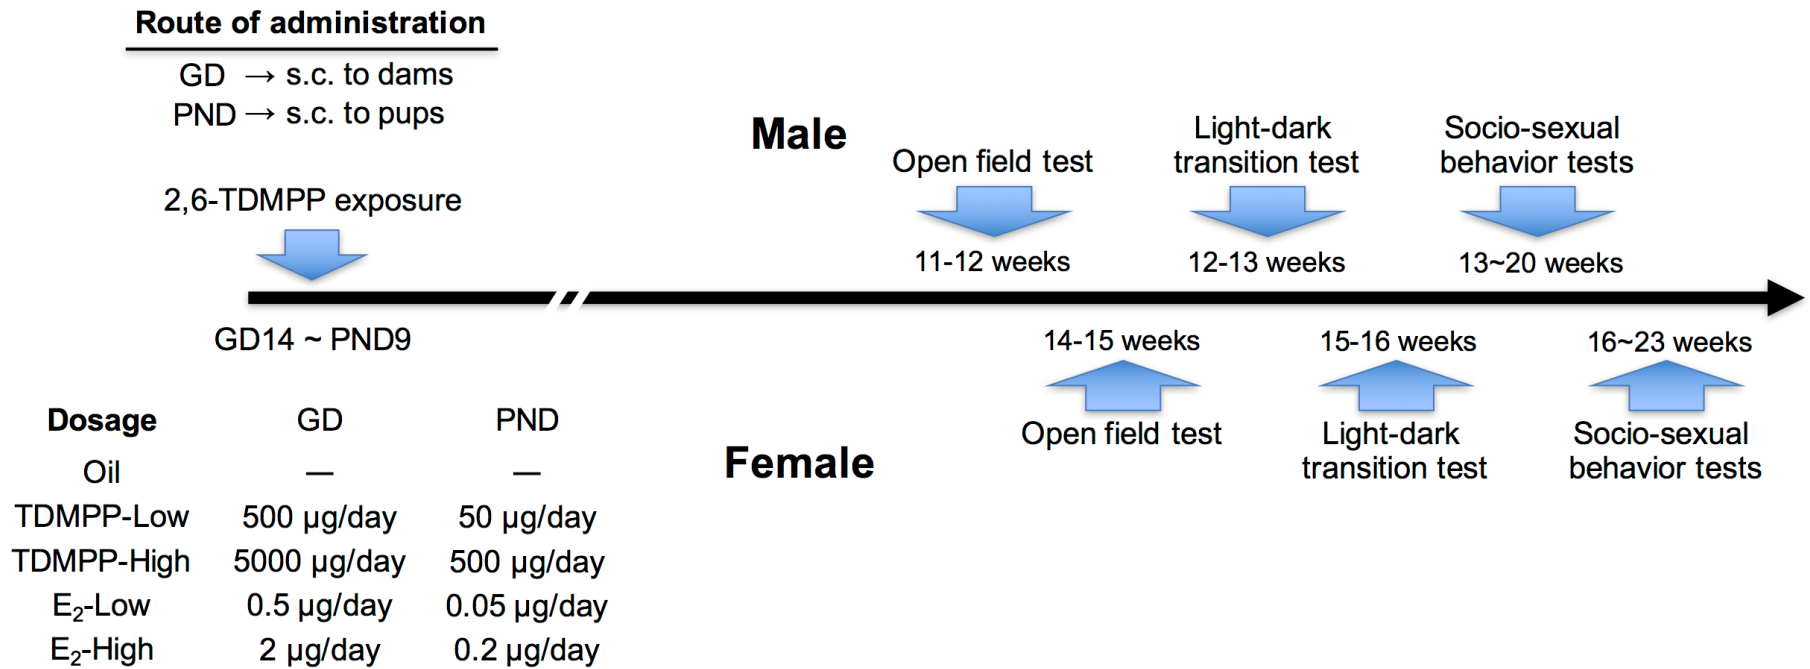

**Figure 1.**

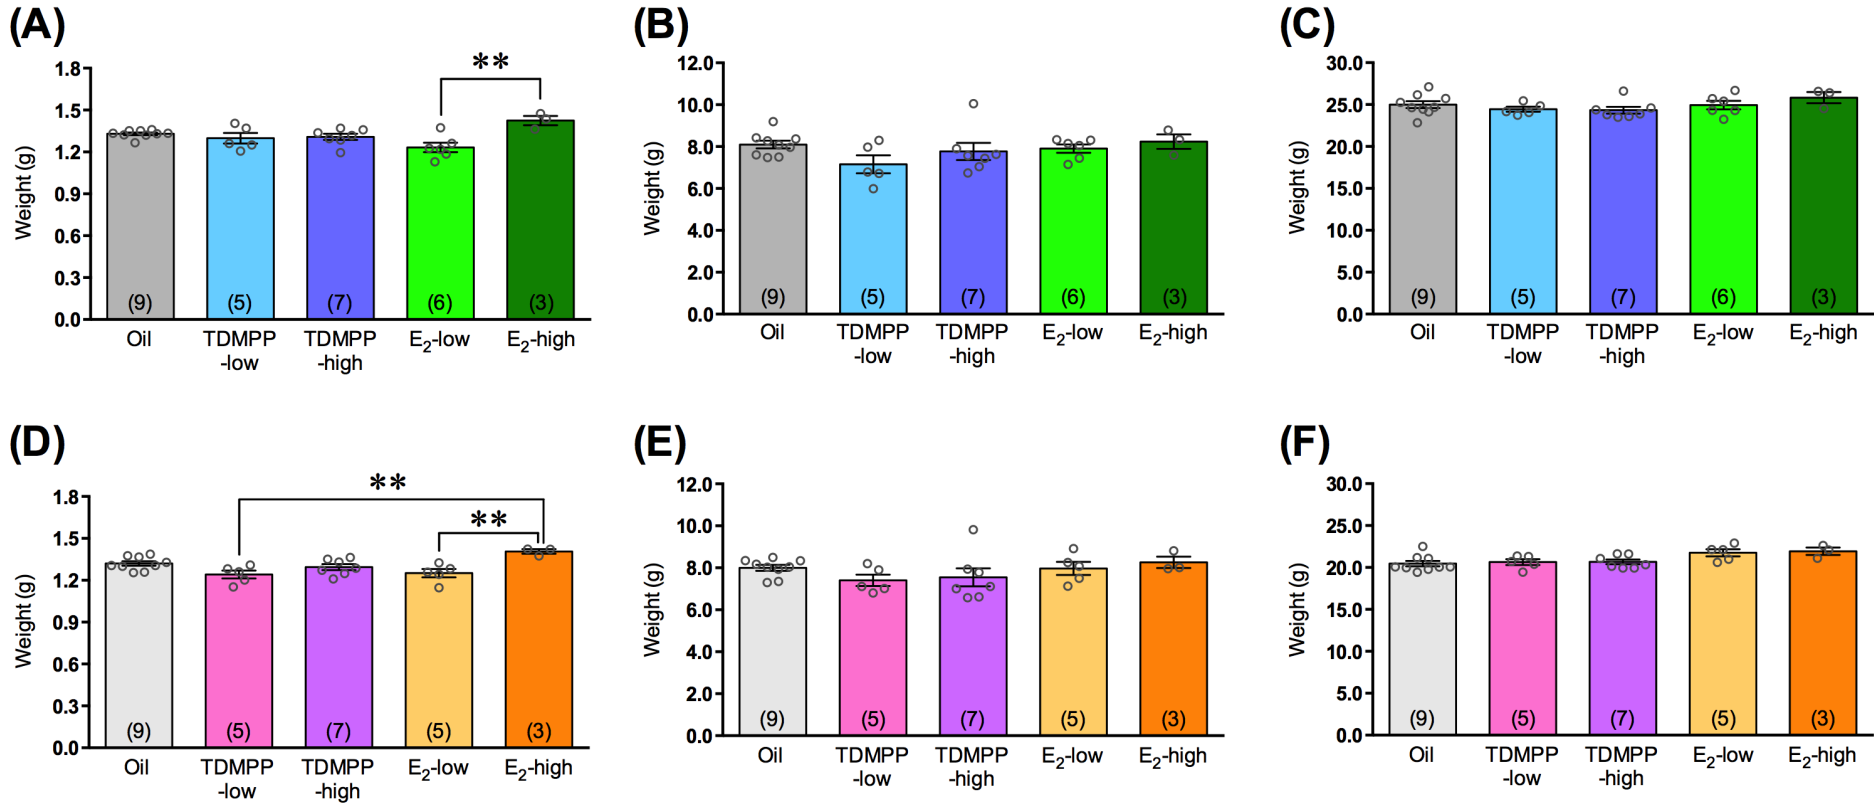

**Figure 2.**

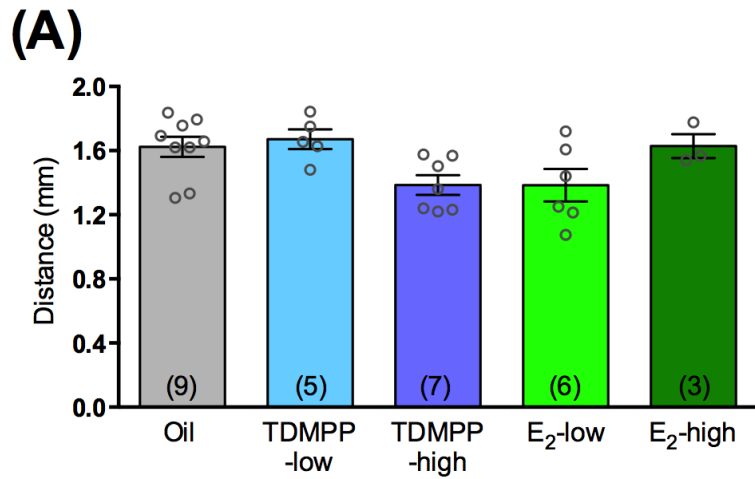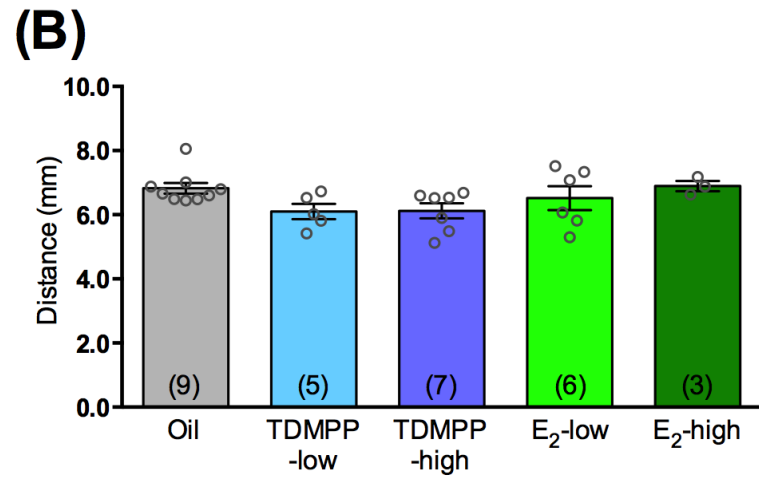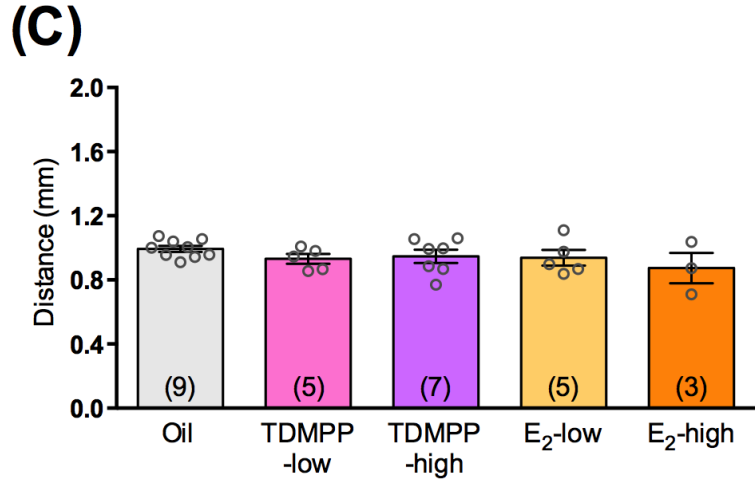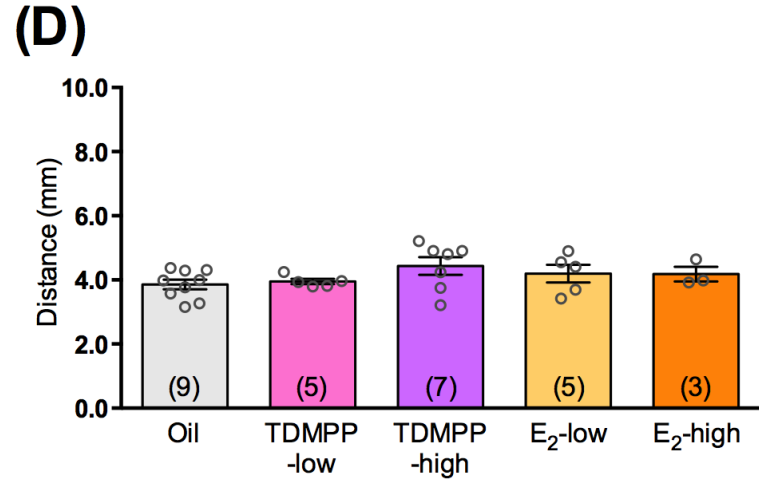

**Figure 3.**

**(A)**

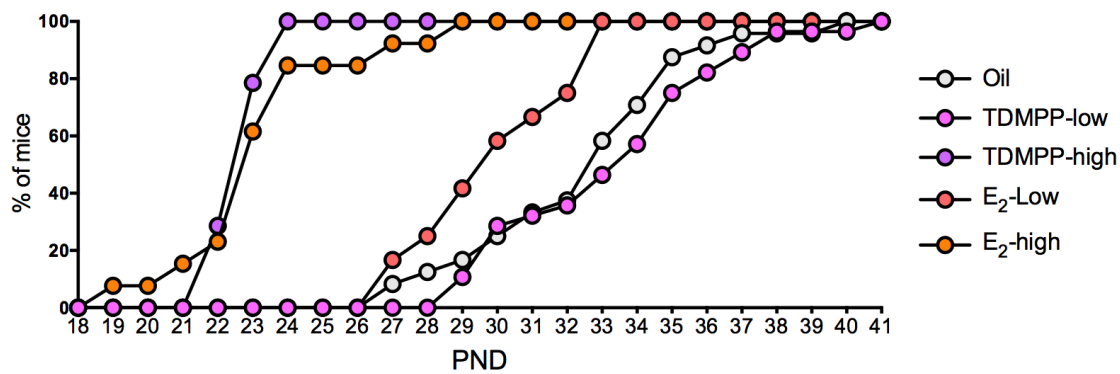

**(B)**

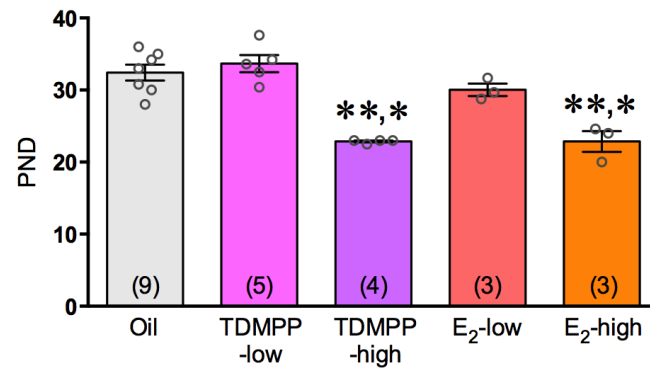

**Figure 4.**

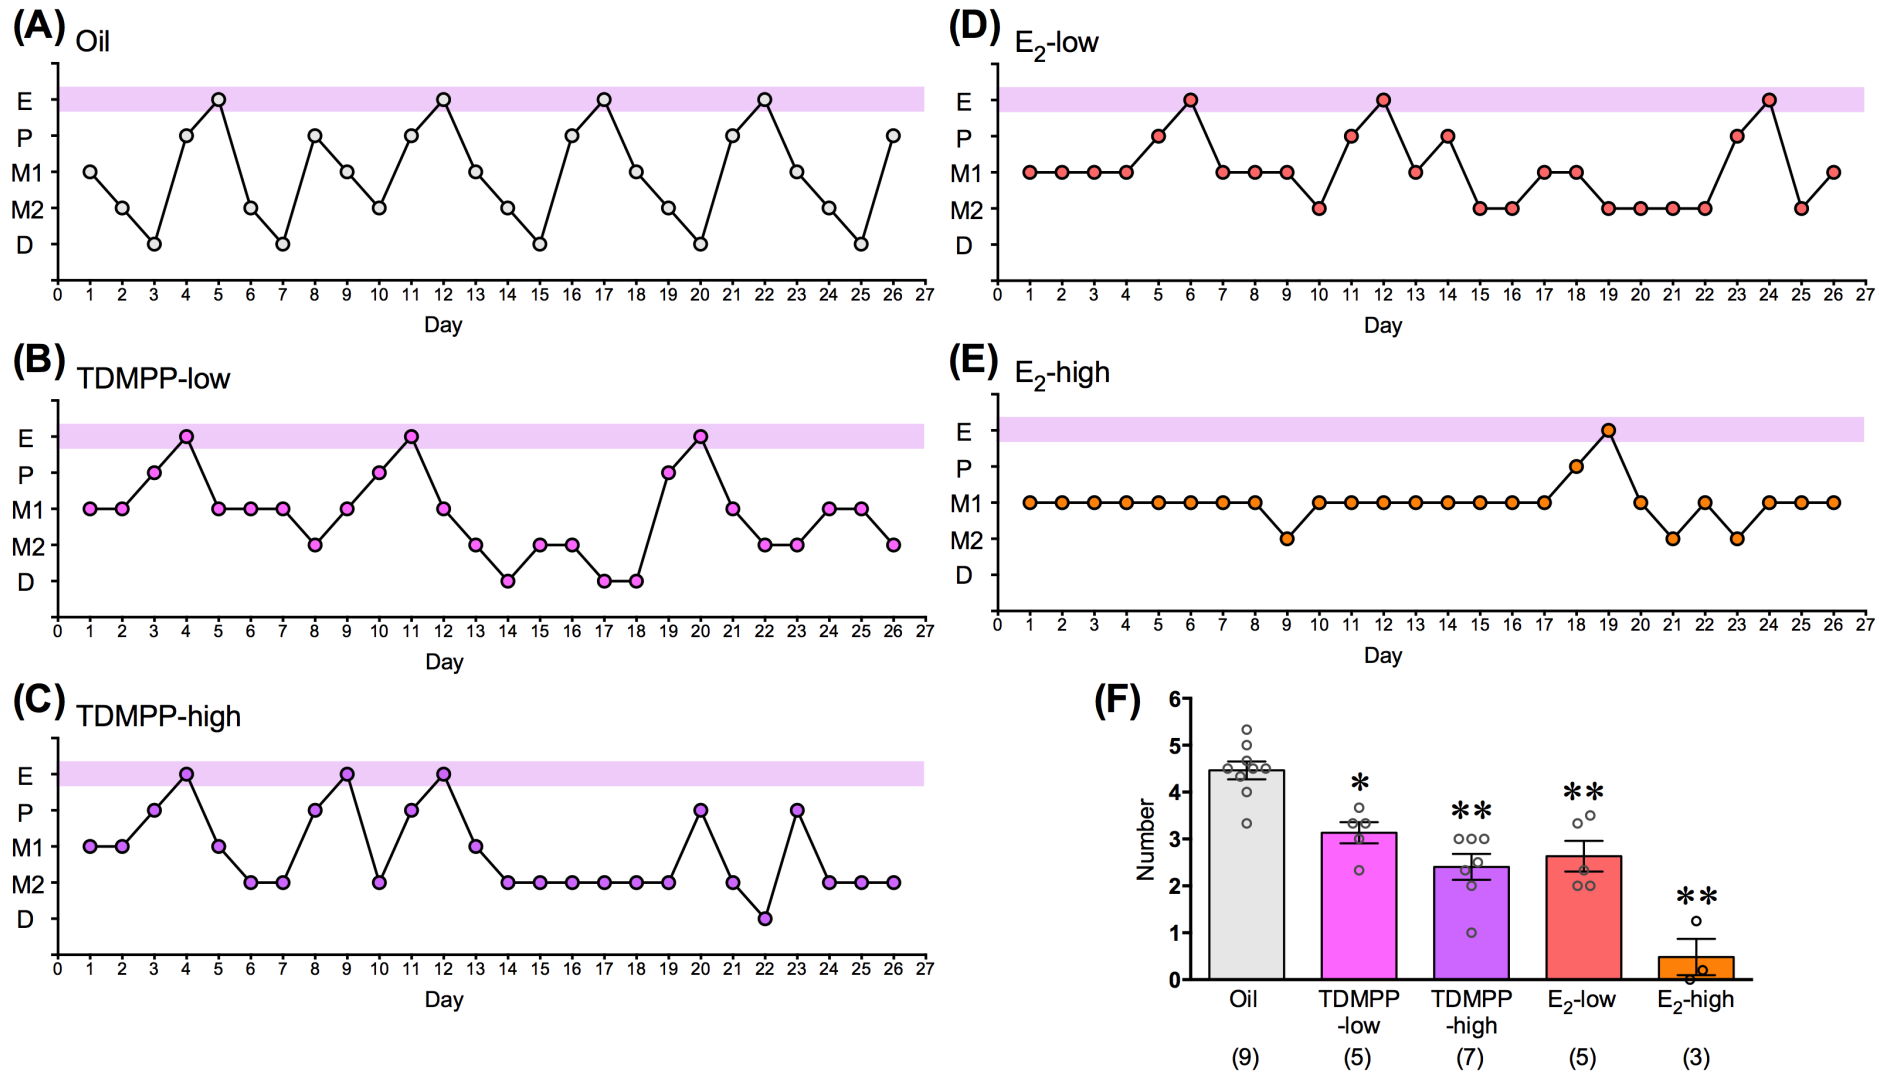

**Figure 5.**

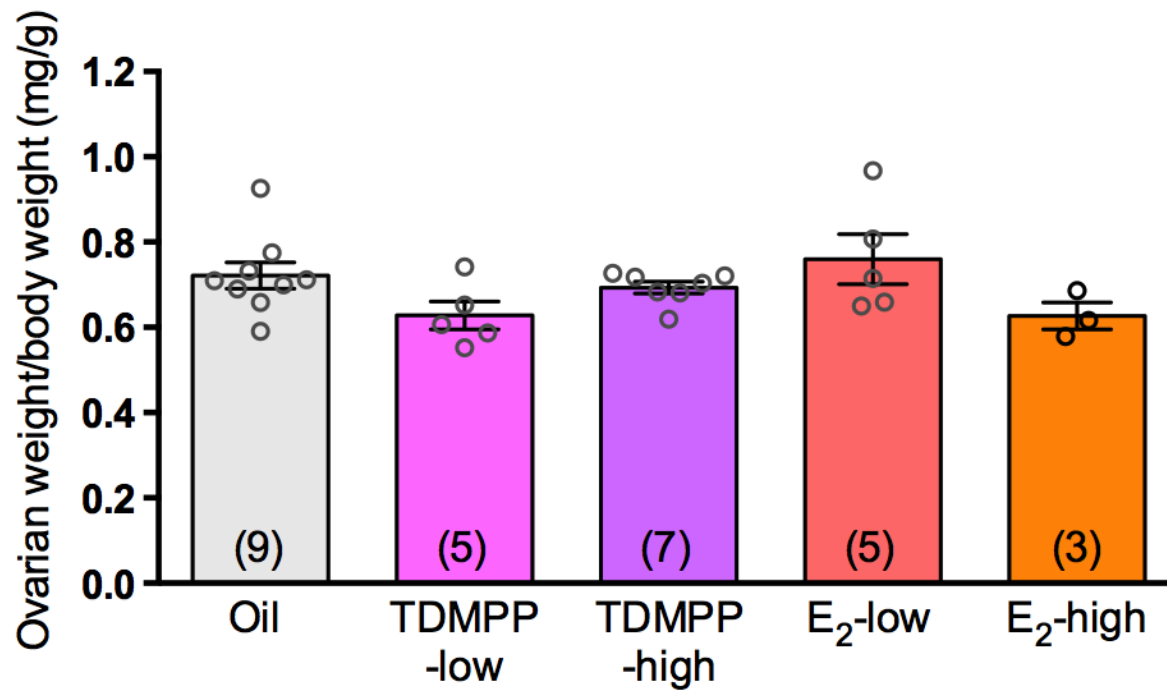

**Figure 6.**

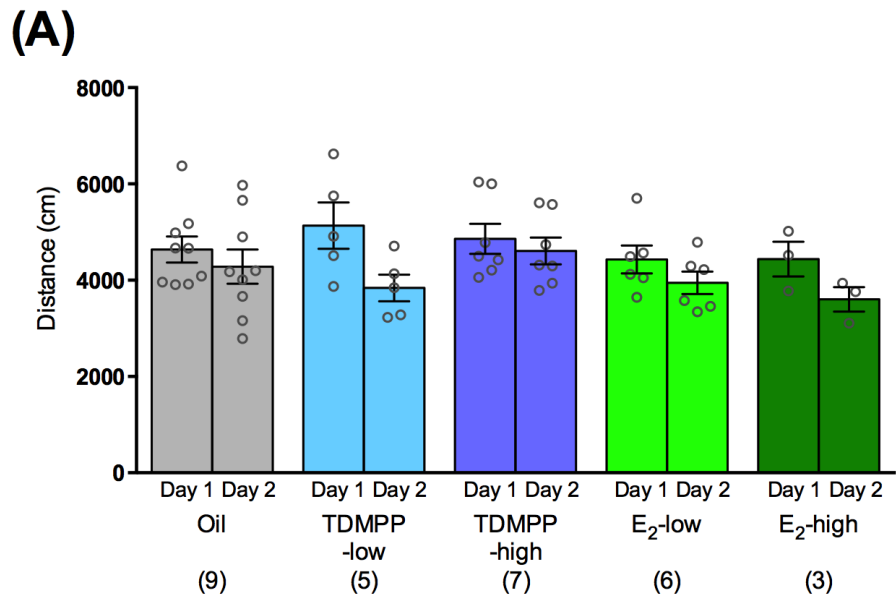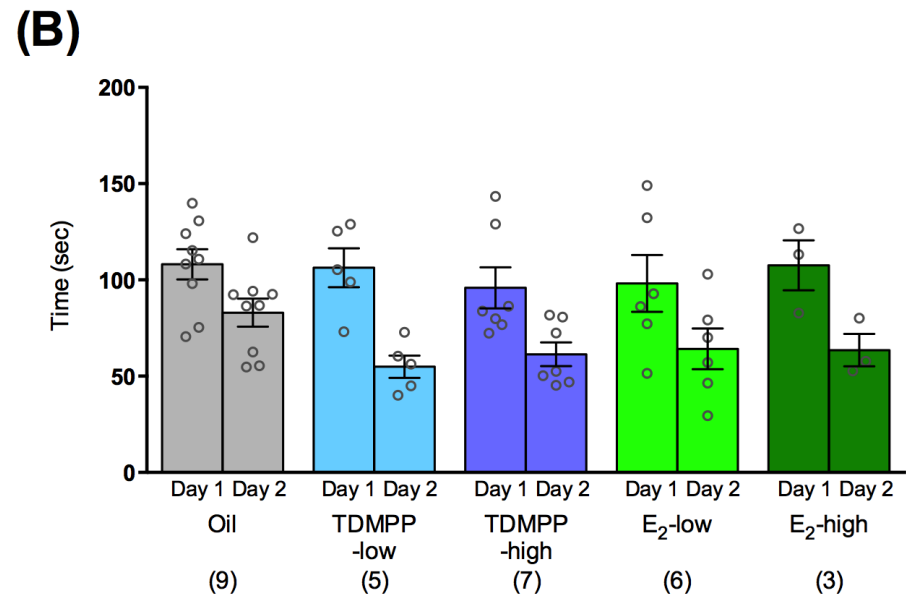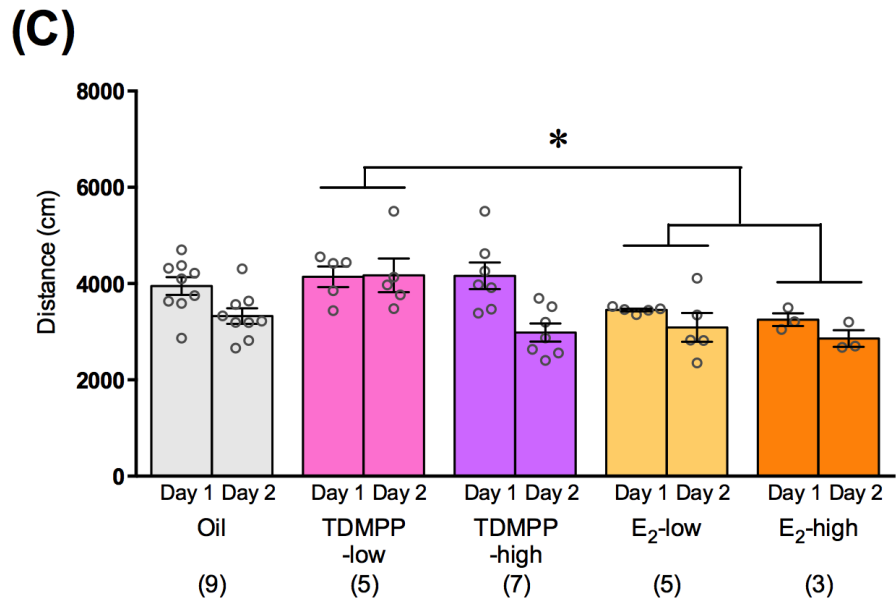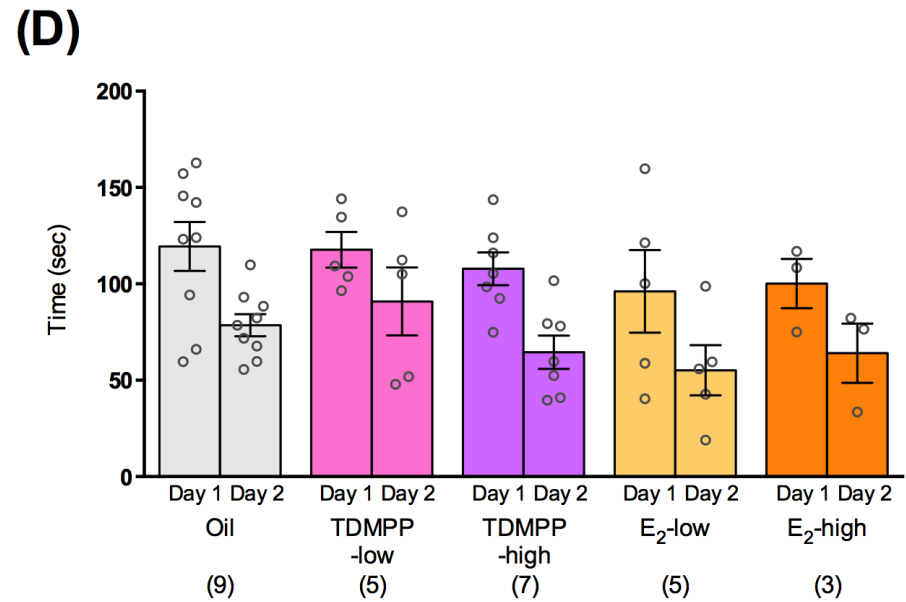

**Figure 7.**

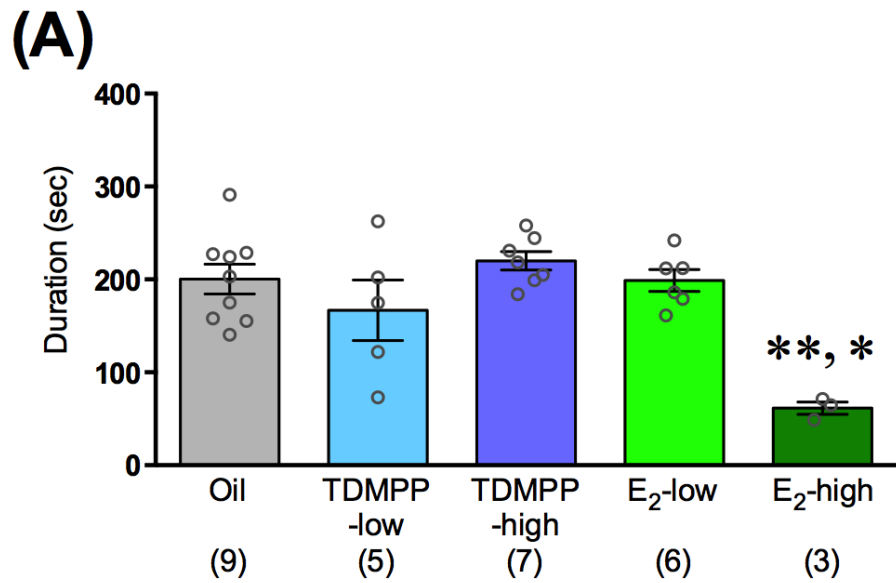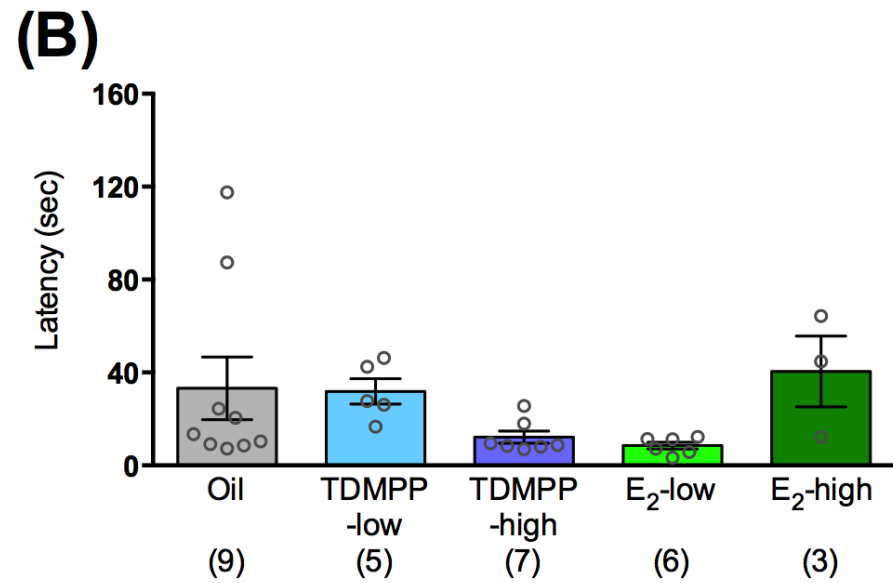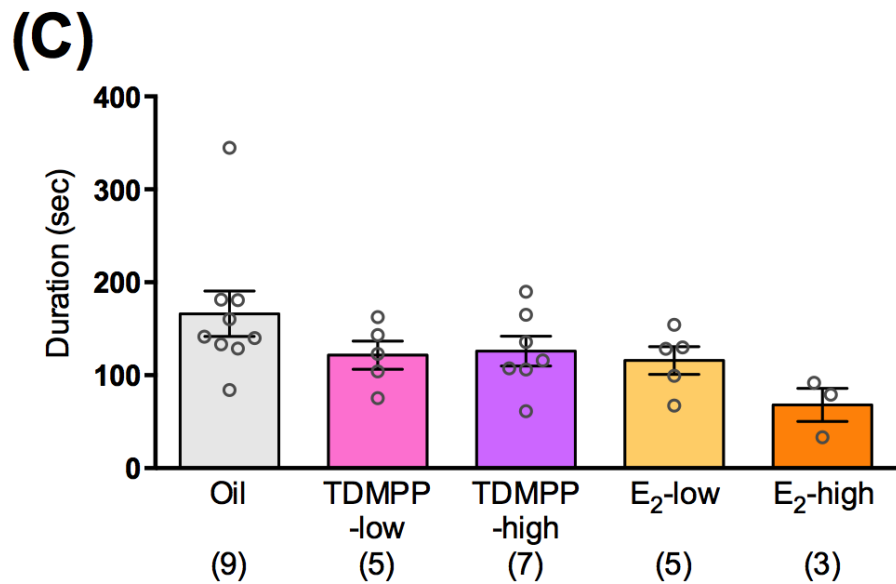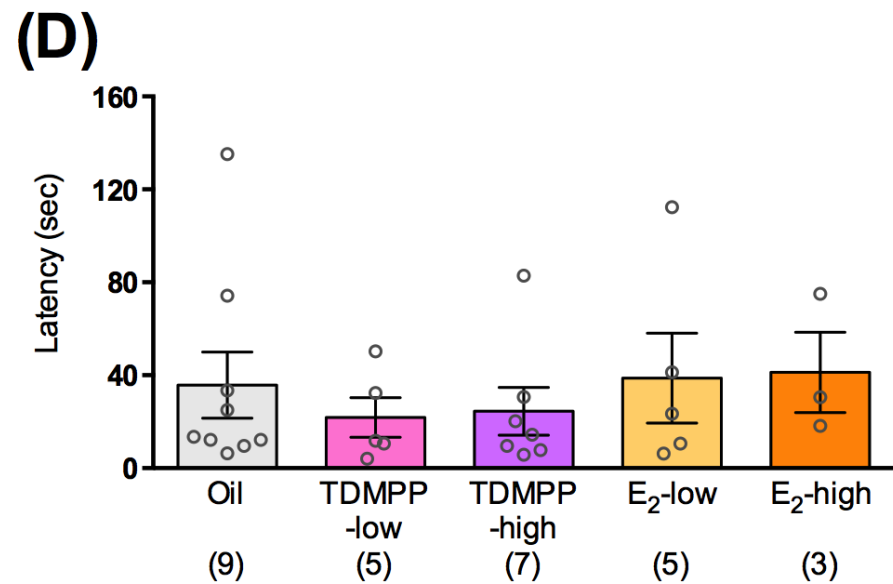

**Figure 8.**



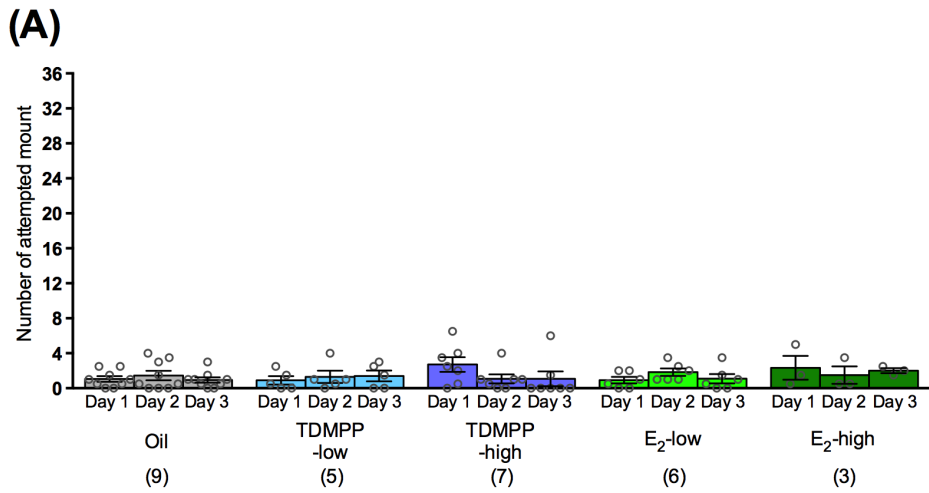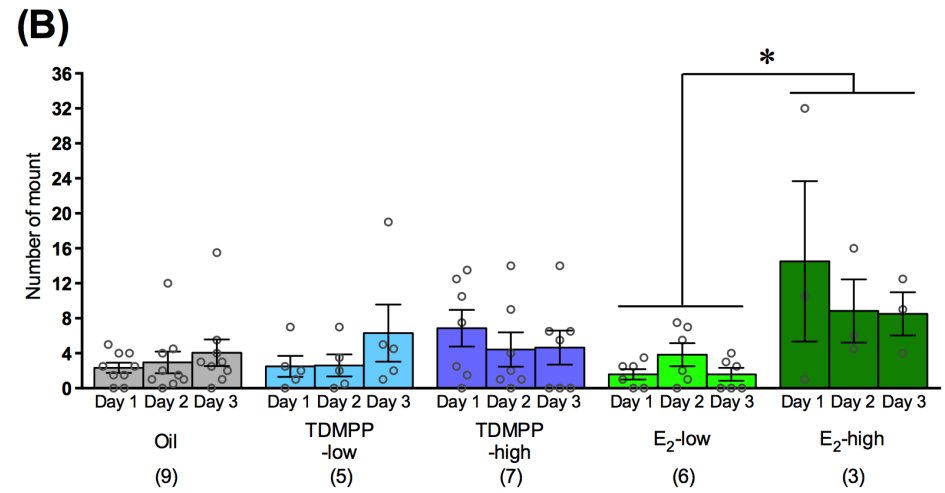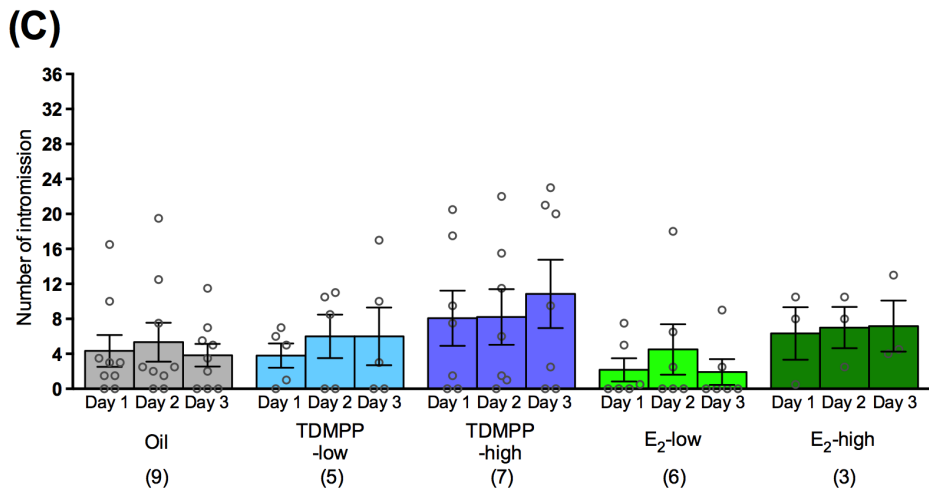

**Figure 9.**

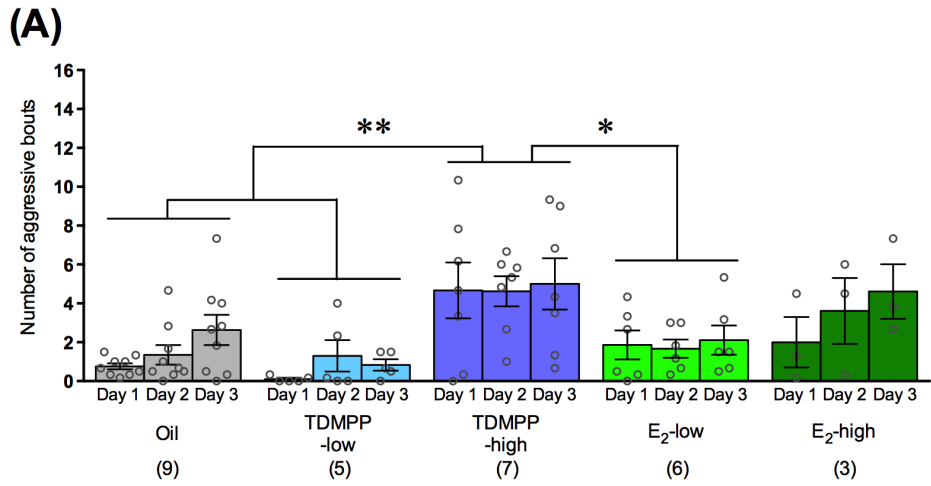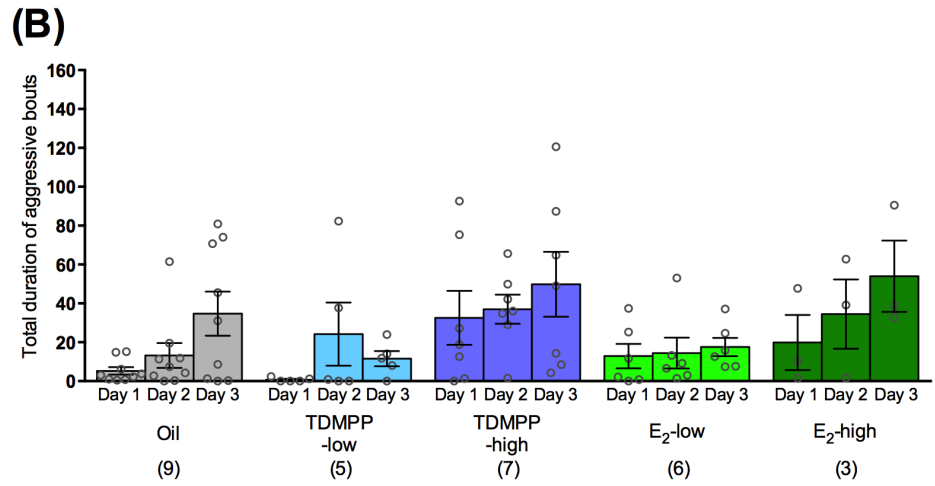

**Figure 10.**

**(A)**

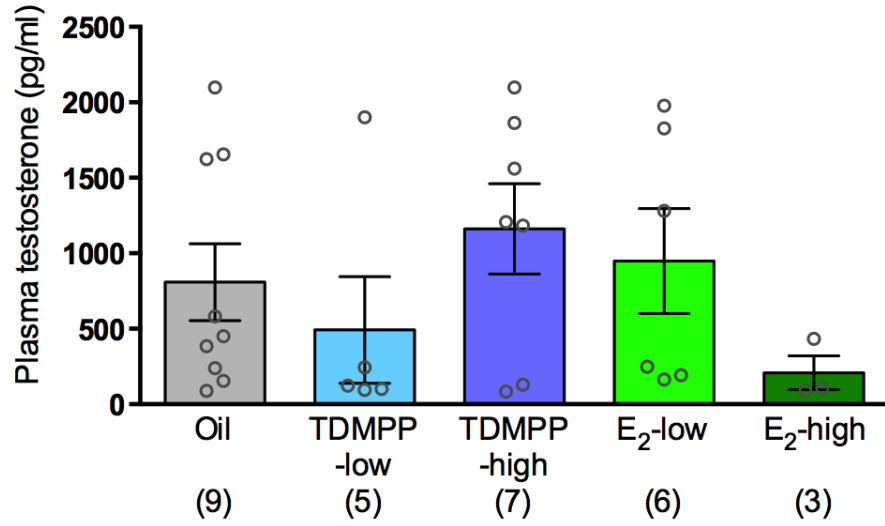

**(B)**

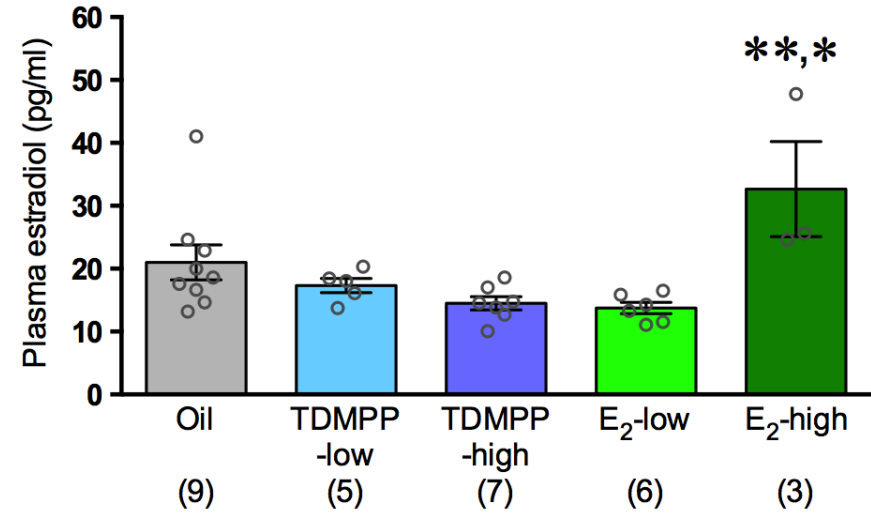

**Figure 11.**

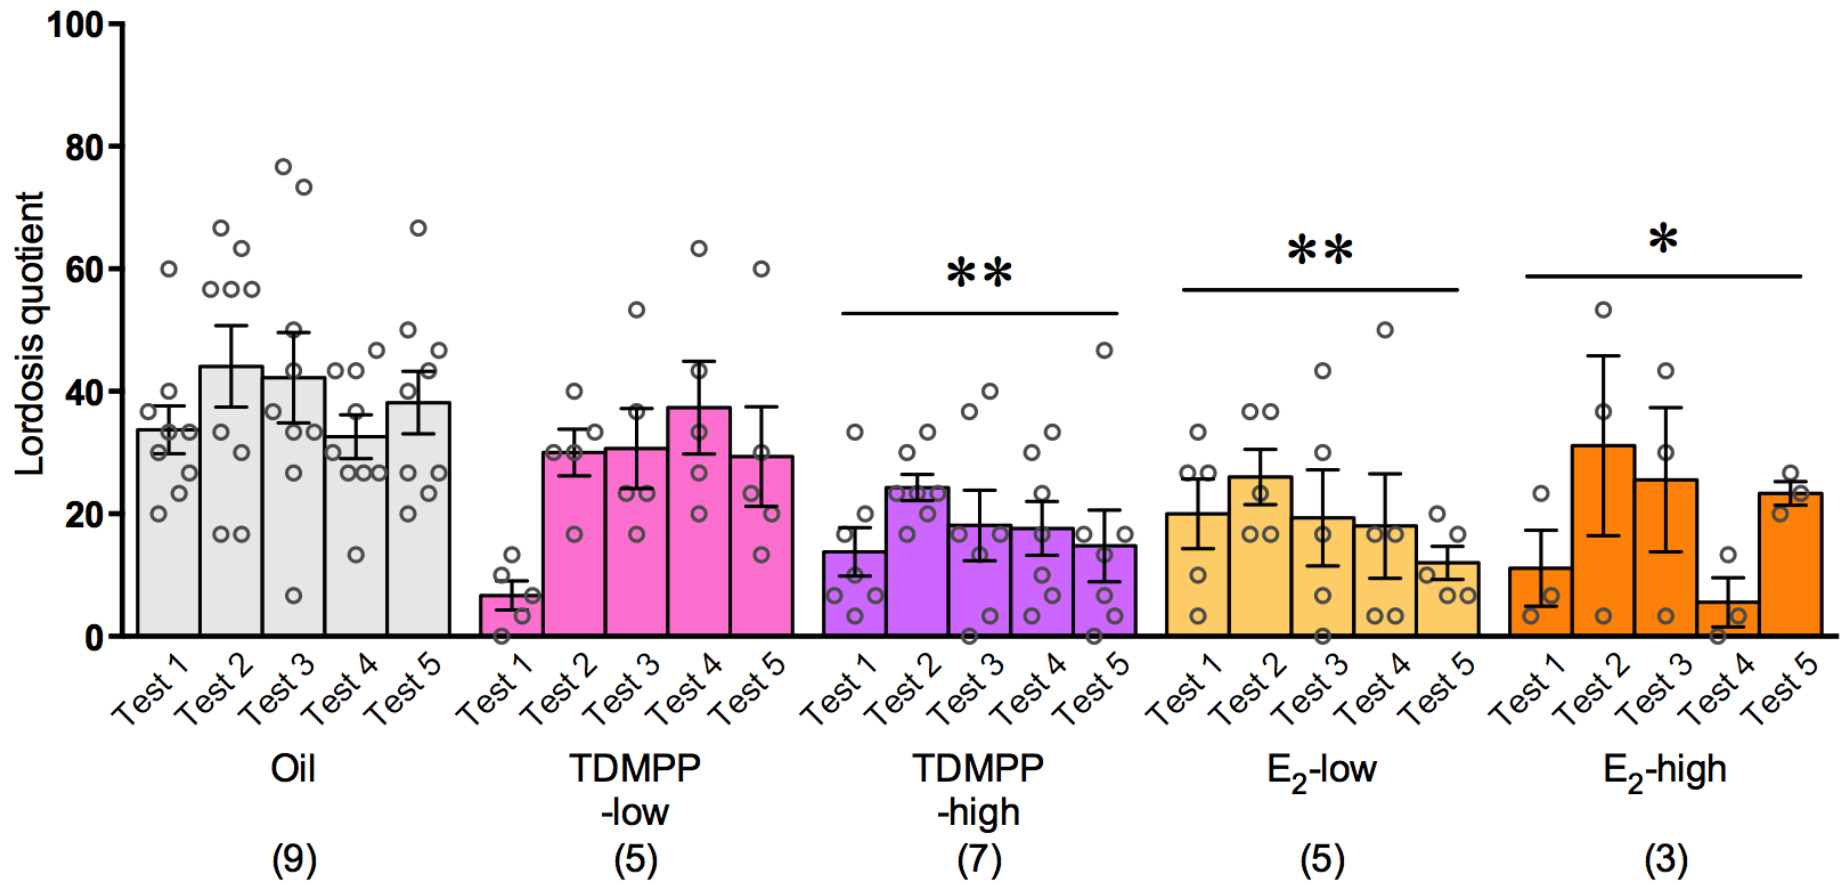

Figure 12.

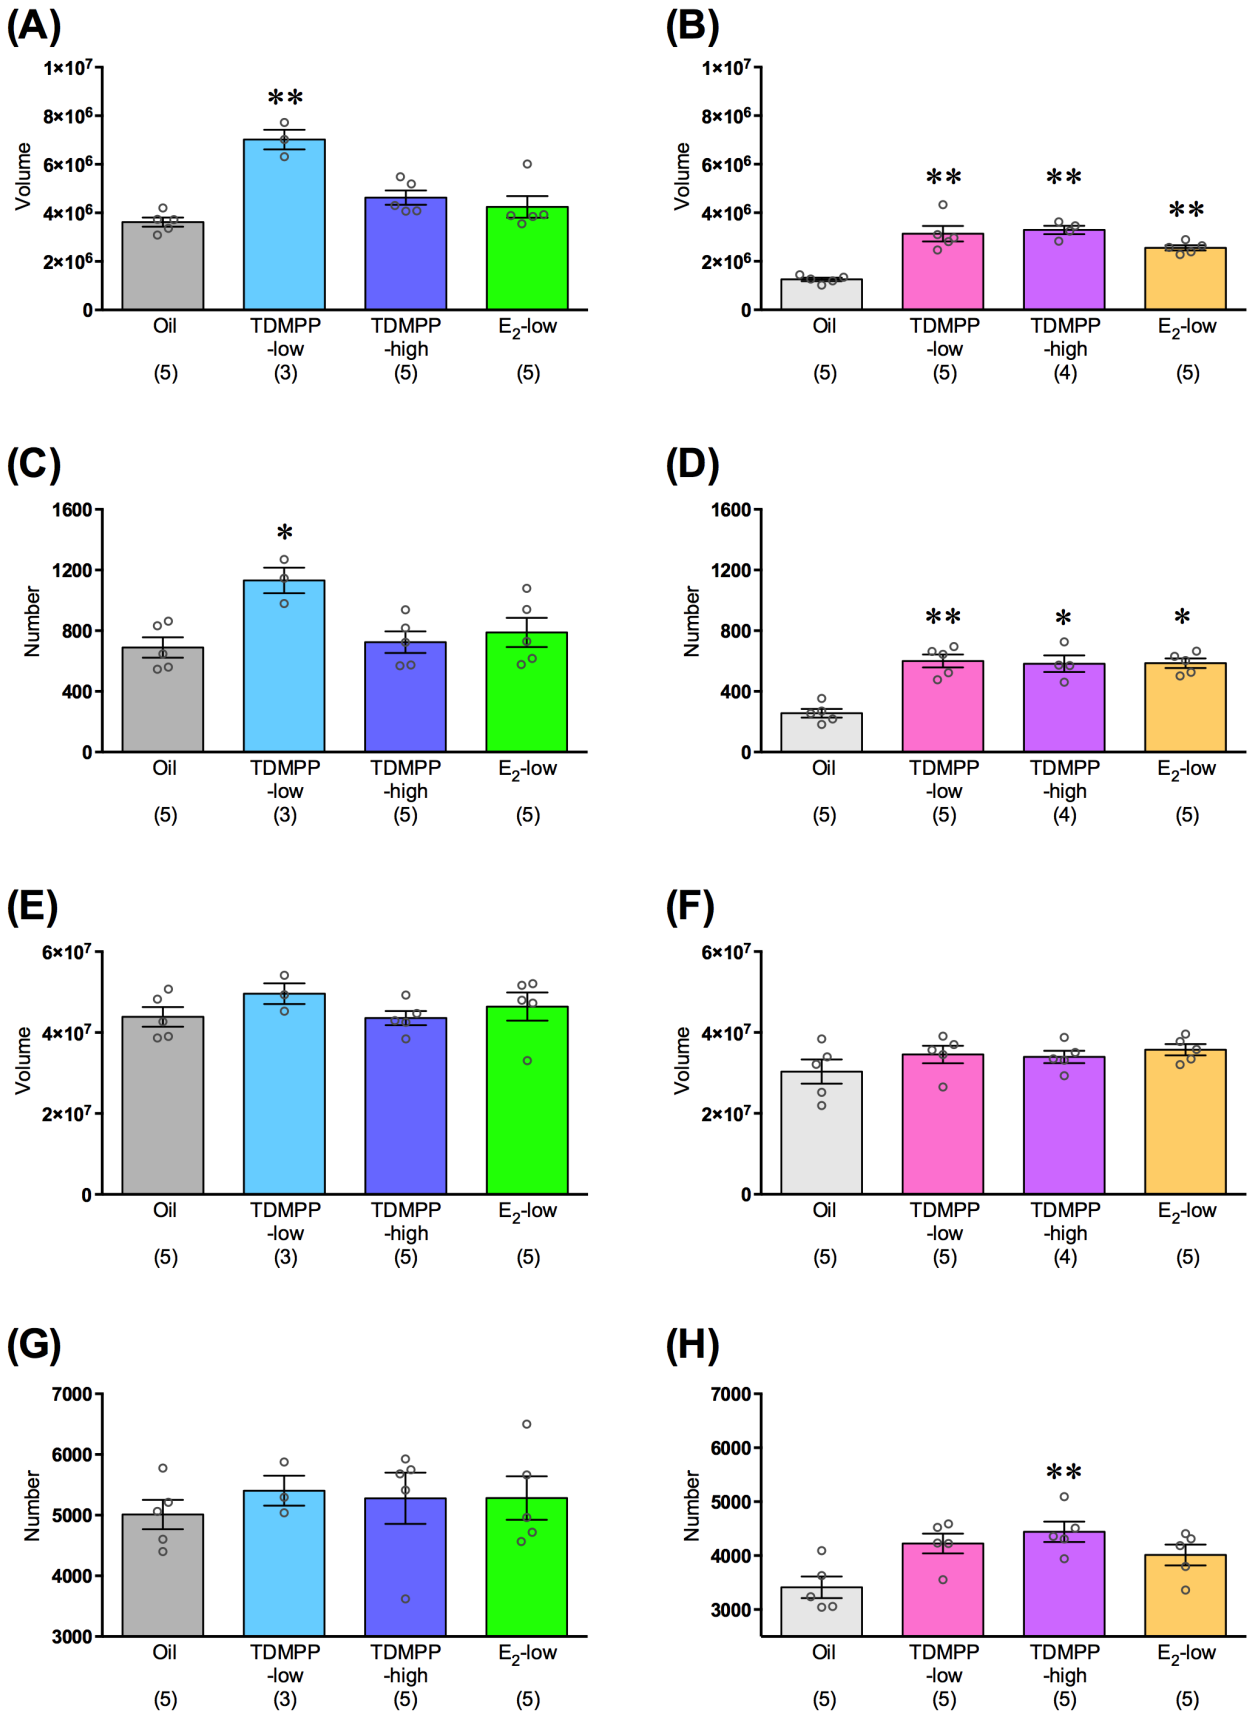

**Figure 13.**

1 Table 1

2 **Parameters for stereological analyses for Calb-SDN**

3

|   | <u>Oil</u>               |             | <u>TDMPP-low</u> |             | <u>TDMPP-high</u> |             | <u>E2</u>   |             |             |
|---|--------------------------|-------------|------------------|-------------|-------------------|-------------|-------------|-------------|-------------|
|   | Male                     | Female      | Male             | Female      | Male              | Female      | Male        | Female      |             |
| 4 |                          |             |                  |             |                   |             |             |             |             |
| 5 |                          |             |                  |             |                   |             |             |             |             |
| 6 | No. of sections          | 9.8±0.67    | 4.2±0.2          | 10.3±0.33   | 7.6±0.51          | 9±0.32      | 7.6±0.68    | 9.2±0.2     | 7.2±0.37    |
| 7 | Sampling Grid Size       | 70×70 μm    |                  |             |                   |             |             |             |             |
| 8 | Counting frame size      | 35×35 μm    |                  |             |                   |             |             |             |             |
| 9 | Number of sampling sites | 51.8 ± 4.22 | 20.4 ± 1.21      | 98.7 ± 4.91 | 48 ± 4.16         | 68.2 ± 3.85 | 46.6 ± 4.77 | 64.6 ± 4.76 | 41.4 ± 2.98 |

10 Section thickness, 30 μm, section interval, 30 μm; dissector height 14-16 μm; guard zone height, 1.5 μm

11 **Parameters for stereological analyses for BNSTp**

12

|    | <u>Oil</u>               |              | <u>TDMPP-low</u> |              | <u>TDMPP-high</u> |              | <u>E2</u>  |             |              |
|----|--------------------------|--------------|------------------|--------------|-------------------|--------------|------------|-------------|--------------|
|    | Male                     | Female       | Male             | Female       | Male              | Female       | Male       | Female      |              |
| 13 |                          |              |                  |              |                   |              |            |             |              |
| 14 |                          |              |                  |              |                   |              |            |             |              |
| 15 | No. of sections          | 10.8±0.37    | 9±0.45           | 10.7 ± 0.33  | 9.4 ± 0.4         | 11.2 ± 0.37  | 9.6 ± 0.24 | 10.8±0.2    | 9.8±0.37     |
| 16 | Sampling Grid Size       | 100 × 100 μm |                  |              |                   |              |            |             |              |
| 17 | Counting frame size      | 50 × 50 μm   |                  |              |                   |              |            |             |              |
| 18 | Number of sampling sites | 227 ± 9.9    | 168 ± 11.53      | 257.7 ± 9.17 | 202.7 ± 3.53      | 226.8 ± 9.30 | 190 ± 3.65 | 245 ± 14.24 | 202.6 ± 7.28 |

19 Section thickness, 30 μm, section interval, 30 μm; dissector height 14-16 μm; guard zone height, 1.5 μm
